# Supplementary material for: Identification of Preferred Learning Style of Medical and Dental Students Using VARK Questionnaire
Source: Hindawi journal article supplement (doi:10.1155/2021/4355158), 2021-01-01
Supplement: f1 [file 4355158.f1.pdf]

| Repondant number | Gender | Age | Speciality | Degree program | Year of study |
|------------------|--------|-----|------------|----------------|---------------|
| 1                | M      | 20  | MBBS       | Private        | 4             |
| 2                | F      | 20  | MBBS       | Private        | 1             |
| 3                | M      | 20  | MBBS       | Private        | 2             |
| 4                | M      | 21  | MBBS       | Private        | 2             |
| 5                | M      | 23  | MBBS       | public         | 3             |
| 6                | M      | 19  | MBBS       | public         | 4             |
| 7                | F      | 23  | MBBS       | public         | 1             |
| 8                | M      | 20  | MBBS       | public         | 2             |
| 9                | F      | 21  | MBBS       | private        | 1             |
| 10               | F      | 19  | MBBS       | private        | 3             |
| 11               | F      | 19  | MBBS       | private        | 1             |
| 12               | M      | 18  | MBBS       | pubic          | 4             |
| 13               | F      | 19  | MBBS       | private        | 4             |
| 14               | F      | 20  | MBBS       | private        | 5             |
| 15               | M      | 20  | MBBS       | private        | 5             |
| 16               | F      | 21  | MBBS       | private        | 5             |
| 17               | F      | 20  | MBBS       | public         | 5             |
| 18               | M      | 23  | MBBS       | public         | 2             |
| 19               | M      | 22  | MBBS       | public         | 1             |
| 20               | M      | 22  | MBBS       | public         | 1             |
| 21               | F      | 21  | MBBS       | Private        | 3             |
| 22               | M      | 20  | MBBS       | Private        | 2             |
| 23               | F      | 20  | MBBS       | Private        | 3             |
| 24               | F      | 21  | MBBS       | Private        | 4             |
| 25               | F      | 19  | MBBS       | public         | 4             |
| 26               | M      | 19  | MBBS       | public         | 1             |
| 27               | F      | 19  | MBBS       | public         | 2             |
| 28               | F      | 20  | MBBS       | public         | 5             |
| 29               | M      | 23  | MBBS       | private        | 5             |
| 30               | F      | 23  | MBBS       | private        | 2             |
| 31               | F      | 20  | MBBS       | private        | 2             |
| 32               | M      | 20  | MBBS       | pubic          | 3             |
| 33               | M      | 20  | MBBS       | private        | 1             |
| 34               | M      | 21  | MBBS       | private        | 2             |
| 35               | F      | 23  | MBBS       | private        | 1             |
| 36               | M      | 19  | MBBS       | private        | 2             |
| 37               | F      | 23  | MBBS       | public         | 4             |
| 38               | F      | 20  | MBBS       | public         | 5             |
| 39               | F      | 21  | MBBS       | public         | 1             |
| 40               | M      | 19  | MBBS       | public         | 4             |
| 41               | F      | 19  | MBBS       | Private        | 5             |
| 42               | F      | 18  | MBBS       | Private        | 1             |
| 43               | M      | 19  | MBBS       | Private        | 4             |
| 44               | F      | 20  | MBBS       | Private        | 2             |
| 45               | F      | 20  | MBBS       | public         | 5             |

|    |   |    |      |         |   |
|----|---|----|------|---------|---|
| 46 | M | 21 | MBBS | public  | 3 |
| 47 | M | 20 | MBBS | public  | 1 |
| 48 | M | 23 | MBBS | public  | 2 |
| 49 | F | 22 | MBBS | private | 2 |
| 50 | M | 22 | MBBS | private | 3 |
| 51 | F | 21 | MBBS | private | 4 |
| 52 | F | 20 | MBBS | pubic   | 1 |
| 53 | F | 20 | MBBS | private | 2 |
| 54 | M | 21 | MBBS | private | 1 |
| 55 | F | 19 | MBBS | private | 3 |
| 56 | F | 19 | MBBS | private | 1 |
| 57 | M | 19 | MBBS | public  | 4 |
| 58 | F | 20 | MBBS | public  | 4 |
| 59 | F | 23 | MBBS | public  | 5 |
| 60 | M | 23 | MBBS | public  | 5 |
| 61 | M | 20 | MBBS | Private | 5 |
| 62 | M | 20 | MBBS | Private | 5 |
| 63 | F | 20 | MBBS | Private | 2 |
| 64 | M | 21 | MBBS | Private | 1 |
| 65 | F | 23 | MBBS | public  | 1 |
| 66 | F | 19 | MBBS | public  | 3 |
| 67 | F | 23 | MBBS | public  | 2 |
| 68 | M | 20 | MBBS | public  | 3 |
| 69 | F | 21 | MBBS | private | 4 |
| 70 | F | 19 | MBBS | private | 4 |
| 71 | M | 19 | MBBS | private | 1 |
| 72 | F | 18 | MBBS | pubic   | 2 |
| 73 | F | 19 | MBBS | private | 5 |
| 74 | M | 20 | MBBS | private | 5 |
| 75 | M | 20 | MBBS | private | 2 |
| 76 | M | 21 | MBBS | private | 2 |
| 77 | F | 20 | MBBS | public  | 3 |
| 78 | M | 23 | MBBS | public  | 1 |
| 79 | F | 22 | MBBS | public  | 2 |
| 80 | F | 22 | MBBS | public  | 1 |
| 81 | F | 21 | MBBS | Private | 2 |
| 82 | M | 20 | MBBS | Private | 4 |
| 83 | F | 20 | MBBS | Private | 5 |
| 84 | F | 21 | MBBS | Private | 1 |
| 85 | M | 19 | MBBS | public  | 4 |
| 86 | F | 19 | MBBS | public  | 5 |
| 87 | F | 19 | MBBS | public  | 1 |
| 88 | M | 20 | MBBS | public  | 4 |
| 89 | M | 23 | MBBS | private | 2 |
| 90 | M | 23 | MBBS | private | 5 |
| 91 | F | 20 | MBBS | private | 3 |
| 92 | M | 20 | MBBS | pubic   | 1 |

|     |   |    |      |         |   |
|-----|---|----|------|---------|---|
| 93  | F | 20 | MBBS | private | 2 |
| 94  | F | 21 | MBBS | private | 2 |
| 95  | F | 23 | MBBS | private | 3 |
| 96  | M | 19 | MBBS | private | 4 |
| 97  | F | 23 | MBBS | public  | 1 |
| 98  | F | 20 | MBBS | public  | 2 |
| 99  | M | 21 | MBBS | public  | 1 |
| 100 | F | 19 | MBBS | public  | 3 |
| 101 | F | 19 | MBBS | Private | 1 |
| 102 | M | 18 | MBBS | Private | 4 |
| 103 | M | 19 | MBBS | Private | 4 |
| 104 | M | 20 | MBBS | Private | 5 |
| 105 | F | 20 | MBBS | public  | 5 |
| 106 | M | 21 | MBBS | public  | 5 |
| 107 | F | 20 | MBBS | public  | 5 |
| 108 | F | 23 | MBBS | public  | 2 |
| 109 | F | 22 | MBBS | private | 1 |
| 110 | M | 22 | MBBS | private | 1 |
| 111 | F | 21 | MBBS | private | 3 |
| 112 | F | 20 | MBBS | pubic   | 2 |
| 113 | M | 20 | MBBS | private | 3 |
| 114 | F | 21 | MBBS | private | 4 |
| 115 | F | 19 | MBBS | private | 4 |
| 116 | M | 19 | MBBS | private | 1 |
| 117 | M | 19 | MBBS | public  | 2 |
| 118 | M | 20 | MBBS | public  | 5 |
| 119 | F | 23 | MBBS | public  | 5 |
| 120 | M | 23 | MBBS | public  | 2 |
| 121 | F | 20 | MBBS | Private | 2 |
| 122 | F | 20 | MBBS | Private | 3 |
| 123 | F | 20 | MBBS | Private | 1 |
| 124 | M | 21 | MBBS | Private | 2 |
| 125 | F | 23 | MBBS | public  | 1 |
| 126 | F | 19 | MBBS | public  | 2 |
| 127 | M | 23 | MBBS | public  | 4 |
| 128 | F | 20 | MBBS | public  | 5 |
| 129 | F | 21 | MBBS | private | 1 |
| 130 | M | 19 | MBBS | private | 4 |
| 131 | M | 19 | MBBS | private | 5 |
| 132 | M | 18 | MBBS | pubic   | 1 |
| 133 | F | 19 | MBBS | private | 4 |
| 134 | M | 20 | MBBS | private | 2 |
| 135 | F | 20 | MBBS | private | 5 |
| 136 | F | 21 | MBBS | private | 3 |
| 137 | F | 20 | MBBS | public  | 1 |
| 138 | M | 23 | MBBS | public  | 2 |
| 139 | F | 22 | MBBS | public  | 2 |

|     |   |    |      |         |   |
|-----|---|----|------|---------|---|
| 140 | F | 22 | MBBS | public  | 3 |
| 141 | M | 21 | MBBS | Private | 4 |
| 142 | F | 20 | MBBS | Private | 1 |
| 143 | F | 20 | MBBS | Private | 2 |
| 144 | M | 21 | MBBS | Private | 1 |
| 145 | M | 19 | MBBS | public  | 3 |
| 146 | M | 19 | MBBS | public  | 1 |
| 147 | F | 19 | MBBS | public  | 4 |
| 148 | M | 20 | MBBS | public  | 4 |
| 149 | F | 23 | MBBS | private | 5 |
| 150 | F | 23 | MBBS | private | 5 |
| 151 | F | 20 | MBBS | private | 5 |
| 152 | M | 20 | MBBS | pubic   | 5 |
| 153 | F | 20 | MBBS | private | 2 |
| 154 | F | 21 | MBBS | private | 1 |
| 155 | M | 23 | MBBS | private | 1 |
| 156 | F | 19 | MBBS | private | 3 |
| 157 | F | 23 | MBBS | public  | 2 |
| 158 | M | 20 | MBBS | public  | 3 |
| 159 | M | 21 | MBBS | public  | 4 |
| 160 | M | 19 | MBBS | public  | 4 |
| 161 | F | 19 | MBBS | Private | 1 |
| 162 | M | 18 | MBBS | Private | 2 |
| 163 | F | 19 | MBBS | Private | 5 |
| 164 | F | 20 | MBBS | Private | 5 |
| 165 | F | 20 | MBBS | public  | 2 |
| 166 | M | 21 | MBBS | public  | 2 |
| 167 | F | 20 | MBBS | public  | 3 |
| 168 | F | 23 | MBBS | public  | 1 |
| 169 | M | 22 | MBBS | private | 2 |
| 170 | F | 22 | MBBS | private | 1 |
| 171 | F | 21 | MBBS | private | 2 |
| 172 | M | 20 | MBBS | pubic   | 4 |
| 173 | M | 20 | MBBS | private | 5 |
| 174 | M | 21 | MBBS | private | 1 |
| 175 | F | 19 | MBBS | private | 4 |
| 176 | M | 19 | MBBS | private | 5 |
| 177 | F | 19 | MBBS | public  | 1 |
| 178 | F | 20 | MBBS | public  | 4 |
| 179 | F | 23 | MBBS | public  | 2 |
| 180 | M | 23 | MBBS | public  | 5 |
| 181 | F | 20 | MBBS | Private | 3 |
| 182 | F | 20 | MBBS | Private | 1 |
| 183 | M | 20 | MBBS | Private | 2 |
| 184 | F | 21 | MBBS | Private | 2 |
| 185 | F | 23 | MBBS | public  | 3 |
| 186 | M | 19 | MBBS | public  | 4 |

|     |   |    |      |         |   |
|-----|---|----|------|---------|---|
| 187 | M | 23 | MBBS | public  | 1 |
| 188 | M | 20 | MBBS | public  | 2 |
| 189 | F | 21 | MBBS | private | 1 |
| 190 | M | 19 | MBBS | private | 3 |
| 191 | F | 19 | MBBS | private | 1 |
| 192 | F | 18 | MBBS | pubic   | 4 |
| 193 | F | 19 | MBBS | private | 4 |
| 194 | M | 20 | MBBS | private | 5 |
| 195 | F | 20 | MBBS | private | 5 |
| 196 | F | 21 | MBBS | private | 5 |
| 197 | M | 20 | MBBS | public  | 5 |
| 198 | F | 23 | MBBS | public  | 2 |
| 199 | F | 22 | MBBS | public  | 1 |
| 200 | M | 22 | MBBS | public  | 1 |
| 201 | M | 21 | MBBS | Private | 3 |
| 202 | M | 20 | MBBS | Private | 2 |
| 203 | F | 20 | MBBS | Private | 3 |
| 204 | M | 21 | MBBS | Private | 4 |
| 205 | F | 19 | MBBS | public  | 4 |
| 206 | F | 19 | MBBS | public  | 1 |
| 207 | F | 19 | MBBS | public  | 2 |
| 208 | M | 20 | MBBS | public  | 5 |
| 209 | F | 23 | MBBS | private | 5 |
| 210 | F | 23 | MBBS | private | 2 |
| 211 | M | 20 | MBBS | private | 2 |
| 212 | F | 20 | MBBS | pubic   | 3 |
| 213 | F | 20 | MBBS | private | 1 |
| 214 | M | 21 | MBBS | private | 2 |
| 215 | M | 23 | MBBS | private | 1 |
| 216 | M | 19 | MBBS | private | 2 |
| 217 | F | 23 | MBBS | public  | 4 |
| 218 | M | 20 | MBBS | public  | 5 |
| 219 | F | 21 | MBBS | public  | 1 |
| 220 | F | 19 | MBBS | public  | 4 |
| 221 | F | 19 | MBBS | Private | 5 |
| 222 | M | 18 | MBBS | Private | 1 |
| 223 | F | 19 | MBBS | Private | 4 |
| 224 | F | 20 | MBBS | Private | 2 |
| 225 | M | 20 | MBBS | public  | 5 |
| 226 | F | 21 | MBBS | public  | 3 |
| 227 | F | 20 | MBBS | public  | 1 |
| 228 | M | 23 | MBBS | public  | 2 |
| 229 | M | 22 | MBBS | private | 2 |
| 230 | M | 22 | MBBS | private | 3 |
| 231 | F | 21 | MBBS | private | 4 |
| 232 | M | 20 | MBBS | pubic   | 1 |
| 233 | F | 20 | MBBS | private | 2 |

|     |   |    |      |         |   |
|-----|---|----|------|---------|---|
| 234 | F | 21 | MBBS | private | 1 |
| 235 | F | 19 | MBBS | private | 3 |
| 236 | M | 19 | MBBS | private | 1 |
| 237 | F | 19 | MBBS | public  | 4 |
| 238 | F | 20 | MBBS | public  | 4 |
| 239 | M | 23 | MBBS | public  | 5 |
| 240 | F | 23 | MBBS | public  | 5 |
| 241 | F | 20 | MBBS | Private | 5 |
| 242 | M | 20 | MBBS | Private | 5 |
| 243 | M | 20 | MBBS | Private | 2 |
| 244 | M | 21 | MBBS | Private | 1 |
| 245 | F | 23 | MBBS | public  | 1 |
| 246 | M | 19 | MBBS | public  | 3 |
| 247 | F | 23 | MBBS | public  | 2 |
| 248 | F | 20 | MBBS | public  | 3 |
| 249 | F | 21 | MBBS | private | 4 |
| 250 | M | 19 | MBBS | private | 4 |
| 251 | F | 19 | MBBS | private | 1 |
| 252 | F | 18 | MBBS | pubic   | 2 |
| 253 | M | 19 | MBBS | private | 5 |
| 254 | F | 20 | MBBS | private | 5 |
| 255 | F | 20 | MBBS | private | 2 |
| 256 | M | 21 | MBBS | private | 2 |
| 257 | M | 20 | MBBS | public  | 3 |
| 258 | M | 23 | MBBS | public  | 1 |
| 259 | F | 22 | MBBS | public  | 2 |
| 260 | M | 22 | MBBS | public  | 1 |
| 261 | F | 21 | MBBS | Private | 2 |
| 262 | F | 20 | MBBS | Private | 4 |
| 263 | F | 20 | MBBS | Private | 5 |
| 264 | M | 21 | MBBS | Private | 1 |
| 265 | F | 19 | MBBS | public  | 4 |
| 266 | F | 19 | MBBS | public  | 5 |
| 267 | M | 19 | MBBS | public  | 1 |
| 268 | F | 20 | MBBS | public  | 4 |
| 269 | F | 23 | MBBS | private | 2 |
| 270 | M | 23 | MBBS | private | 5 |
| 271 | M | 20 | MBBS | private | 3 |
| 272 | M | 20 | MBBS | pubic   | 1 |
| 273 | F | 20 | MBBS | private | 2 |
| 274 | M | 21 | MBBS | private | 2 |
| 275 | F | 23 | MBBS | private | 3 |
| 276 | F | 19 | MBBS | private | 4 |
| 277 | F | 23 | MBBS | public  | 1 |
| 278 | M | 20 | MBBS | public  | 2 |
| 279 | F | 21 | MBBS | public  | 1 |
| 280 | F | 19 | MBBS | public  | 3 |

|     |   |    |      |         |   |
|-----|---|----|------|---------|---|
| 281 | M | 19 | MBBS | Private | 1 |
| 282 | F | 18 | MBBS | Private | 4 |
| 283 | F | 19 | MBBS | Private | 4 |
| 284 | M | 20 | MBBS | Private | 5 |
| 285 | M | 20 | MBBS | public  | 5 |
| 286 | M | 21 | MBBS | public  | 5 |
| 287 | F | 20 | MBBS | public  | 5 |
| 288 | M | 23 | MBBS | public  | 2 |
| 289 | F | 22 | MBBS | private | 1 |
| 290 | F | 22 | MBBS | private | 1 |
| 291 | F | 21 | MBBS | private | 3 |
| 292 | M | 20 | MBBS | pubic   | 2 |
| 293 | F | 20 | MBBS | private | 3 |
| 294 | F | 21 | MBBS | private | 4 |
| 295 | M | 19 | MBBS | private | 4 |
| 296 | F | 19 | MBBS | private | 1 |
| 297 | F | 19 | MBBS | public  | 2 |
| 298 | M | 20 | MBBS | public  | 5 |
| 299 | M | 23 | MBBS | public  | 5 |
| 300 | M | 23 | MBBS | public  | 2 |
| 301 | F | 20 | MBBS | Private | 2 |
| 302 | M | 20 | MBBS | Private | 3 |
| 303 | F | 20 | MBBS | Private | 1 |
| 304 | F | 21 | MBBS | Private | 2 |
| 305 | F | 23 | MBBS | public  | 1 |
| 306 | M | 19 | MBBS | public  | 2 |
| 307 | F | 23 | MBBS | public  | 4 |
| 308 | F | 20 | MBBS | public  | 5 |
| 309 | M | 21 | MBBS | private | 1 |
| 310 | F | 19 | MBBS | private | 4 |
| 311 | F | 19 | MBBS | private | 5 |
| 312 | M | 18 | MBBS | pubic   | 1 |
| 313 | M | 19 | MBBS | private | 4 |
| 314 | M | 20 | MBBS | private | 2 |
| 315 | F | 20 | MBBS | private | 5 |
| 316 | M | 21 | MBBS | private | 3 |
| 317 | F | 20 | MBBS | public  | 1 |
| 318 | F | 23 | MBBS | public  | 2 |
| 319 | F | 22 | MBBS | public  | 2 |
| 320 | M | 22 | MBBS | public  | 3 |
| 321 | F | 21 | MBBS | Private | 4 |
| 322 | F | 20 | MBBS | Private | 1 |
| 323 | M | 20 | MBBS | Private | 2 |
| 324 | F | 21 | MBBS | Private | 1 |
| 325 | F | 19 | MBBS | public  | 3 |
| 326 | M | 19 | MBBS | public  | 1 |
| 327 | M | 19 | MBBS | public  | 4 |

|     |   |    |      |         |   |
|-----|---|----|------|---------|---|
| 328 | M | 20 | MBBS | public  | 4 |
| 329 | F | 23 | MBBS | private | 5 |
| 330 | M | 23 | MBBS | private | 5 |
| 331 | F | 20 | MBBS | private | 5 |
| 332 | F | 20 | MBBS | pubic   | 5 |
| 333 | F | 20 | MBBS | private | 2 |
| 334 | M | 21 | MBBS | private | 1 |
| 335 | F | 23 | MBBS | private | 1 |
| 336 | F | 19 | MBBS | private | 3 |
| 337 | M | 23 | MBBS | public  | 2 |
| 338 | F | 20 | MBBS | public  | 3 |
| 339 | F | 21 | MBBS | public  | 4 |
| 340 | M | 19 | MBBS | public  | 4 |
| 341 | M | 19 | MBBS | Private | 1 |
| 342 | M | 18 | MBBS | Private | 2 |
| 343 | F | 19 | MBBS | Private | 5 |
| 344 | M | 20 | MBBS | Private | 5 |
| 345 | F | 20 | MBBS | public  | 2 |
| 346 | F | 21 | MBBS | public  | 2 |
| 347 | F | 20 | MBBS | public  | 3 |
| 348 | M | 23 | MBBS | public  | 1 |
| 349 | F | 22 | MBBS | private | 2 |
| 350 | F | 22 | MBBS | private | 1 |
| 351 | M | 21 | MBBS | private | 2 |
| 352 | F | 20 | MBBS | pubic   | 4 |
| 353 | F | 20 | MBBS | private | 5 |
| 354 | M | 21 | MBBS | private | 1 |
| 355 | M | 19 | MBBS | private | 4 |
| 356 | M | 19 | MBBS | private | 5 |
| 357 | F | 19 | MBBS | public  | 1 |
| 358 | M | 20 | MBBS | public  | 4 |
| 359 | F | 23 | MBBS | public  | 2 |
| 360 | F | 23 | MBBS | public  | 5 |
| 361 | F | 20 | MBBS | Private | 3 |
| 362 | M | 20 | MBBS | Private | 1 |
| 363 | F | 20 | MBBS | Private | 2 |
| 364 | F | 21 | MBBS | Private | 2 |
| 365 | M | 23 | MBBS | public  | 3 |
| 366 | F | 19 | MBBS | public  | 4 |
| 367 | F | 23 | MBBS | public  | 1 |
| 368 | M | 20 | MBBS | public  | 2 |
| 369 | M | 21 | MBBS | private | 1 |
| 370 | M | 19 | MBBS | private | 3 |
| 371 | F | 19 | MBBS | private | 1 |
| 372 | M | 18 | MBBS | pubic   | 4 |
| 373 | F | 19 | MBBS | private | 4 |
| 374 | F | 20 | MBBS | private | 5 |



|     |   |    |      |         |   |
|-----|---|----|------|---------|---|
| 375 | F | 20 | MBBS | private | 5 |
| 376 | M | 21 | MBBS | private | 5 |
| 377 | F | 20 | MBBS | public  | 5 |
| 378 | F | 23 | MBBS | public  | 2 |
| 379 | M | 22 | MBBS | public  | 1 |
| 380 | F | 22 | MBBS | public  | 1 |
| 381 | F | 21 | MBBS | private | 3 |
| 382 | M | 20 | MBBS | private | 2 |
| 383 | M | 20 | MBBS | private | 3 |
| 384 | M | 21 | MBBS | pubic   | 4 |
| 385 | F | 19 | MBBS | private | 4 |
| 386 | M | 19 | MBBS | private | 1 |
| 387 | F | 19 | MBBS | private | 2 |
| 388 | F | 20 | MBBS | private | 5 |
| 389 | F | 23 | MBBS | public  | 5 |
| 390 | M | 23 | MBBS | public  | 2 |
| 391 | F | 20 | MBBS | public  | 2 |
| 392 | F | 20 | MBBS | public  | 3 |
| 393 | M | 20 | MBBS | Private | 1 |
| 394 | F | 21 | MBBS | Private | 2 |
| 395 | F | 23 | MBBS | Private | 1 |
| 396 | M | 19 | MBBS | Private | 2 |
| 397 | M | 23 | MBBS | public  | 4 |
| 398 | M | 20 | MBBS | public  | 5 |
| 399 | F | 21 | MBBS | public  | 1 |
| 400 | M | 19 | MBBS | public  | 4 |
| 401 | F | 19 | MBBS | private | 5 |
| 402 | F | 18 | MBBS | private | 1 |
| 403 | F | 19 | MBBS | private | 4 |
| 404 | M | 20 | MBBS | pubic   | 2 |
| 405 | F | 20 | MBBS | private | 5 |
| 406 | F | 21 | MBBS | private | 3 |
| 407 | M | 20 | MBBS | private | 1 |
| 408 | F | 23 | MBBS | private | 2 |
| 409 | F | 22 | MBBS | public  | 2 |
| 410 | M | 22 | MBBS | public  | 3 |
| 411 | M | 21 | MBBS | public  | 4 |
| 412 | M | 20 | MBBS | public  | 1 |
| 413 | F | 20 | MBBS | Private | 2 |
| 414 | M | 21 | MBBS | Private | 1 |
| 415 | F | 19 | MBBS | Private | 3 |
| 416 | F | 19 | MBBS | Private | 1 |
| 417 | F | 19 | MBBS | public  | 4 |
| 418 | M | 20 | MBBS | public  | 4 |
| 419 | F | 23 | MBBS | public  | 5 |
| 420 | F | 23 | MBBS | public  | 5 |
| 421 | M | 20 | MBBS | private | 5 |

|     |   |    |      |         |   |
|-----|---|----|------|---------|---|
| 422 | F | 20 | MBBS | private | 5 |
| 423 | F | 20 | MBBS | private | 2 |
| 424 | M | 21 | MBBS | pubic   | 1 |
| 425 | M | 23 | MBBS | private | 1 |
| 426 | M | 19 | MBBS | private | 3 |
| 427 | F | 23 | MBBS | private | 2 |
| 428 | M | 20 | MBBS | private | 3 |
| 429 | F | 21 | MBBS | public  | 4 |
| 430 | F | 19 | MBBS | public  | 4 |
| 431 | F | 19 | MBBS | public  | 1 |
| 432 | M | 18 | MBBS | public  | 2 |
| 433 | F | 19 | MBBS | Private | 5 |
| 434 | F | 20 | MBBS | Private | 5 |
| 435 | M | 20 | MBBS | Private | 2 |
| 436 | F | 21 | MBBS | Private | 2 |
| 437 | F | 20 | MBBS | public  | 3 |
| 438 | M | 23 | MBBS | public  | 1 |
| 439 | M | 22 | MBBS | public  | 2 |
| 440 | M | 22 | MBBS | public  | 1 |
| 441 | F | 21 | MBBS | private | 2 |
| 442 | M | 20 | MBBS | private | 4 |
| 443 | F | 20 | MBBS | private | 5 |
| 444 | F | 21 | MBBS | pubic   | 1 |
| 445 | F | 19 | MBBS | private | 4 |
| 446 | M | 19 | MBBS | private | 5 |
| 447 | F | 19 | MBBS | private | 1 |
| 448 | F | 20 | MBBS | private | 4 |
| 449 | M | 23 | MBBS | public  | 2 |
| 450 | F | 23 | MBBS | public  | 5 |
| 451 | F | 20 | MBBS | public  | 3 |
| 452 | M | 20 | MBBS | public  | 1 |
| 453 | M | 20 | MBBS | Private | 2 |
| 454 | M | 21 | MBBS | Private | 2 |
| 455 | F | 23 | MBBS | Private | 3 |
| 456 | M | 19 | MBBS | Private | 4 |
| 457 | F | 23 | MBBS | public  | 1 |
| 458 | F | 20 | MBBS | public  | 2 |
| 459 | F | 21 | MBBS | public  | 1 |
| 460 | M | 19 | MBBS | public  | 3 |
| 461 | F | 19 | MBBS | private | 1 |
| 462 | F | 18 | MBBS | private | 4 |
| 463 | M | 19 | MBBS | private | 4 |
| 464 | F | 20 | MBBS | pubic   | 5 |
| 465 | F | 20 | MBBS | private | 5 |
| 466 | M | 21 | MBBS | private | 5 |
| 467 | M | 20 | MBBS | private | 5 |
| 468 | M | 23 | MBBS | private | 2 |

|     |   |    |      |         |   |
|-----|---|----|------|---------|---|
| 469 | F | 22 | MBBS | public  | 1 |
| 470 | M | 22 | MBBS | public  | 1 |
| 471 | F | 21 | MBBS | public  | 3 |
| 472 | F | 20 | MBBS | public  | 2 |
| 473 | F | 20 | MBBS | Private | 3 |
| 474 | M | 21 | MBBS | Private | 4 |
| 475 | F | 19 | MBBS | Private | 4 |
| 476 | F | 19 | MBBS | Private | 1 |
| 477 | M | 19 | MBBS | public  | 2 |
| 478 | F | 20 | MBBS | public  | 5 |
| 479 | F | 23 | MBBS | public  | 5 |
| 480 | M | 23 | MBBS | public  | 2 |
| 481 | M | 20 | MBBS | private | 2 |
| 482 | M | 20 | MBBS | private | 3 |
| 483 | F | 20 | MBBS | private | 1 |
| 484 | M | 21 | MBBS | pubic   | 2 |
| 485 | F | 23 | MBBS | private | 1 |
| 486 | F | 19 | MBBS | private | 2 |
| 487 | F | 23 | MBBS | private | 4 |
| 488 | M | 20 | MBBS | private | 5 |
| 489 | F | 21 | MBBS | public  | 1 |
| 490 | F | 19 | MBBS | public  | 4 |
| 491 | M | 19 | MBBS | public  | 5 |
| 492 | F | 18 | MBBS | public  | 1 |
| 493 | F | 19 | MBBS | Private | 4 |
| 494 | M | 20 | MBBS | Private | 2 |
| 495 | M | 20 | MBBS | Private | 5 |
| 496 | M | 21 | MBBS | Private | 3 |
| 497 | F | 20 | MBBS | public  | 1 |
| 498 | M | 23 | MBBS | public  | 2 |
| 499 | F | 22 | MBBS | public  | 2 |
| 500 | F | 22 | MBBS | public  | 3 |
| 501 | F | 21 | MBBS | private | 4 |
| 502 | M | 20 | MBBS | private | 1 |
| 503 | F | 20 | MBBS | private | 2 |
| 504 | F | 21 | MBBS | pubic   | 1 |
| 505 | M | 19 | MBBS | private | 3 |
| 506 | F | 19 | MBBS | private | 1 |
| 507 | F | 19 | MBBS | private | 4 |
| 508 | M | 20 | MBBS | private | 4 |
| 509 | M | 23 | MBBS | public  | 5 |
| 510 | M | 23 | MBBS | public  | 5 |
| 511 | F | 20 | MBBS | public  | 5 |
| 512 | M | 20 | MBBS | public  | 5 |
| 513 | F | 20 | MBBS | Private | 2 |
| 514 | F | 21 | MBBS | Private | 1 |
| 515 | F | 23 | MBBS | Private | 1 |

|     |   |    |      |         |   |
|-----|---|----|------|---------|---|
| 516 | M | 19 | MBBS | Private | 3 |
| 517 | F | 23 | MBBS | public  | 2 |
| 518 | F | 20 | MBBS | public  | 3 |
| 519 | M | 21 | MBBS | public  | 4 |
| 520 | F | 19 | MBBS | public  | 4 |
| 521 | F | 19 | MBBS | private | 1 |
| 522 | M | 18 | MBBS | private | 2 |
| 523 | M | 19 | MBBS | private | 5 |
| 524 | M | 20 | MBBS | pubic   | 5 |
| 525 | F | 20 | MBBS | private | 2 |
| 526 | M | 21 | MBBS | private | 2 |
| 527 | F | 20 | MBBS | private | 3 |
| 528 | F | 23 | MBBS | private | 1 |
| 529 | F | 22 | MBBS | public  | 2 |
| 530 | M | 22 | MBBS | public  | 1 |
| 531 | F | 21 | MBBS | public  | 2 |
| 532 | F | 20 | MBBS | public  | 4 |
| 533 | M | 20 | MBBS | Private | 5 |
| 534 | F | 21 | MBBS | Private | 1 |
| 535 | F | 19 | MBBS | Private | 4 |
| 536 | M | 19 | MBBS | Private | 5 |
| 537 | M | 19 | MBBS | public  | 1 |
| 538 | M | 20 | MBBS | public  | 4 |
| 539 | F | 23 | MBBS | public  | 2 |
| 540 | M | 23 | MBBS | public  | 5 |
| 541 | F | 20 | MBBS | private | 3 |
| 542 | F | 20 | MBBS | private | 1 |
| 543 | F | 20 | MBBS | private | 2 |
| 544 | M | 21 | MBBS | pubic   | 2 |
| 545 | F | 23 | MBBS | private | 3 |
| 546 | F | 19 | MBBS | private | 4 |
| 547 | M | 23 | MBBS | private | 1 |
| 548 | F | 20 | MBBS | private | 2 |
| 549 | F | 21 | MBBS | public  | 1 |
| 550 | M | 19 | MBBS | public  | 3 |
| 551 | M | 19 | MBBS | public  | 1 |
| 552 | M | 18 | MBBS | public  | 4 |
| 553 | F | 19 | MBBS | Private | 4 |
| 554 | M | 20 | MBBS | Private | 5 |
| 555 | F | 20 | MBBS | Private | 5 |
| 556 | F | 21 | MBBS | Private | 5 |
| 557 | F | 20 | MBBS | public  | 5 |
| 558 | M | 23 | MBBS | public  | 2 |
| 559 | F | 22 | MBBS | public  | 1 |
| 560 | F | 22 | MBBS | public  | 1 |
| 561 | M | 21 | MBBS | private | 3 |
| 562 | F | 20 | MBBS | private | 2 |

|     |   |    |      |         |   |
|-----|---|----|------|---------|---|
| 563 | F | 20 | MBBS | private | 3 |
| 564 | M | 21 | MBBS | pubic   | 4 |
| 565 | M | 19 | MBBS | private | 4 |
| 566 | M | 19 | MBBS | private | 1 |
| 567 | F | 19 | MBBS | private | 2 |
| 568 | M | 20 | MBBS | private | 5 |
| 569 | F | 23 | MBBS | public  | 5 |
| 570 | F | 23 | MBBS | public  | 2 |
| 571 | F | 20 | MBBS | public  | 2 |
| 572 | M | 20 | MBBS | public  | 3 |
| 573 | F | 20 | MBBS | Private | 1 |
| 574 | F | 21 | MBBS | Private | 2 |
| 575 | M | 23 | MBBS | Private | 1 |
| 576 | F | 19 | MBBS | Private | 2 |
| 577 | F | 23 | MBBS | public  | 4 |
| 578 | M | 20 | MBBS | public  | 5 |
| 579 | M | 21 | MBBS | public  | 1 |
| 580 | M | 19 | MBBS | public  | 4 |
| 581 | F | 19 | MBBS | private | 5 |
| 582 | M | 18 | MBBS | private | 1 |
| 583 | F | 19 | MBBS | private | 4 |
| 584 | F | 20 | MBBS | pubic   | 2 |
| 585 | F | 20 | MBBS | private | 5 |
| 586 | M | 21 | MBBS | private | 3 |
| 587 | F | 20 | MBBS | private | 1 |
| 588 | F | 23 | MBBS | private | 2 |
| 589 | M | 22 | MBBS | public  | 2 |
| 590 | F | 22 | MBBS | public  | 3 |
| 591 | F | 21 | MBBS | public  | 4 |
| 592 | M | 20 | MBBS | public  | 1 |
| 593 | M | 20 | MBBS | Private | 2 |
| 594 | M | 21 | MBBS | Private | 1 |
| 595 | F | 19 | MBBS | Private | 3 |
| 596 | M | 19 | MBBS | Private | 1 |
| 597 | F | 19 | MBBS | public  | 4 |
| 598 | F | 20 | MBBS | public  | 4 |
| 599 | F | 23 | MBBS | public  | 5 |
| 600 | M | 23 | MBBS | public  | 5 |
| 601 | F | 20 | MBBS | private | 5 |
| 602 | F | 20 | MBBS | private | 5 |
| 603 | M | 20 | MBBS | private | 2 |
| 604 | F | 21 | MBBS | pubic   | 1 |
| 605 | F | 23 | MBBS | private | 1 |
| 606 | M | 19 | MBBS | private | 3 |
| 607 | M | 23 | MBBS | private | 2 |
| 608 | M | 20 | MBBS | private | 3 |
| 609 | F | 21 | MBBS | public  | 4 |

|     |   |    |      |         |   |
|-----|---|----|------|---------|---|
| 610 | M | 19 | MBBS | public  | 4 |
| 611 | F | 19 | MBBS | public  | 1 |
| 612 | F | 18 | MBBS | public  | 2 |
| 613 | F | 19 | MBBS | Private | 5 |
| 614 | M | 20 | MBBS | Private | 5 |
| 615 | F | 20 | MBBS | Private | 2 |
| 616 | F | 21 | MBBS | Private | 2 |
| 617 | M | 20 | MBBS | public  | 3 |
| 618 | F | 23 | MBBS | public  | 1 |
| 619 | F | 22 | MBBS | public  | 2 |
| 620 | M | 22 | MBBS | public  | 1 |
| 621 | M | 21 | MBBS | private | 2 |
| 622 | M | 20 | MBBS | private | 4 |
| 623 | F | 20 | MBBS | private | 5 |
| 624 | M | 21 | MBBS | pubic   | 1 |
| 625 | F | 19 | MBBS | private | 4 |
| 626 | F | 19 | MBBS | private | 5 |
| 627 | F | 19 | MBBS | private | 1 |
| 628 | M | 20 | MBBS | private | 4 |
| 629 | F | 23 | MBBS | public  | 2 |
| 630 | F | 23 | MBBS | public  | 5 |
| 631 | M | 20 | MBBS | public  | 3 |
| 632 | F | 20 | MBBS | public  | 1 |
| 633 | F | 20 | MBBS | Private | 2 |
| 634 | M | 21 | MBBS | Private | 2 |
| 635 | M | 23 | MBBS | Private | 3 |
| 636 | M | 19 | MBBS | Private | 4 |
| 637 | F | 23 | MBBS | public  | 1 |
| 638 | M | 20 | MBBS | public  | 2 |
| 639 | F | 21 | MBBS | public  | 1 |
| 640 | F | 19 | MBBS | public  | 3 |
| 641 | F | 19 | MBBS | private | 1 |
| 642 | M | 18 | MBBS | private | 4 |
| 643 | F | 19 | MBBS | private | 4 |
| 644 | F | 20 | MBBS | pubic   | 5 |
| 645 | M | 20 | MBBS | private | 5 |
| 646 | F | 21 | MBBS | private | 5 |
| 647 | F | 20 | MBBS | private | 5 |
| 648 | M | 23 | MBBS | private | 2 |
| 649 | M | 22 | MBBS | public  | 1 |
| 650 | M | 22 | MBBS | public  | 1 |
| 651 | F | 21 | MBBS | public  | 3 |
| 652 | M | 20 | MBBS | public  | 2 |
| 653 | F | 20 | MBBS | private | 3 |
| 654 | F | 21 | MBBS | private | 4 |
| 655 | F | 19 | MBBS | private | 4 |
| 656 | M | 19 | MBBS | pubic   | 1 |

|     |   |    |      |         |   |
|-----|---|----|------|---------|---|
| 657 | F | 19 | MBBS | private | 2 |
| 658 | F | 20 | MBBS | private | 5 |
| 659 | M | 23 | MBBS | private | 5 |
| 660 | F | 23 | MBBS | private | 2 |
| 661 | F | 20 | MBBS | public  | 2 |
| 662 | M | 20 | MBBS | public  | 3 |
| 663 | M | 20 | MBBS | public  | 1 |
| 664 | M | 21 | MBBS | public  | 2 |
| 665 | F | 23 | MBBS | Private | 1 |
| 666 | M | 19 | MBBS | Private | 2 |
| 667 | F | 23 | MBBS | Private | 4 |
| 668 | F | 20 | MBBS | Private | 5 |
| 669 | F | 21 | MBBS | public  | 1 |
| 670 | M | 19 | MBBS | public  | 4 |
| 671 | F | 19 | MBBS | public  | 5 |
| 672 | F | 18 | MBBS | public  | 1 |
| 673 | M | 19 | MBBS | private | 4 |
| 674 | F | 20 | MBBS | private | 2 |
| 675 | F | 20 | MBBS | private | 5 |
| 676 | M | 21 | MBBS | pubic   | 3 |
| 677 | M | 20 | MBBS | private | 1 |
| 678 | M | 23 | MBBS | private | 2 |
| 679 | F | 22 | MBBS | private | 2 |
| 680 | M | 22 | MBBS | private | 3 |
| 681 | F | 21 | MBBS | public  | 4 |
| 682 | F | 20 | MBBS | public  | 1 |
| 683 | F | 20 | MBBS | public  | 2 |
| 684 | M | 21 | MBBS | public  | 1 |
| 685 | F | 19 | MBBS | Private | 3 |
| 686 | F | 19 | MBBS | Private | 1 |
| 687 | M | 19 | MBBS | Private | 4 |
| 688 | F | 20 | MBBS | Private | 4 |
| 689 | F | 23 | MBBS | public  | 5 |
| 690 | M | 23 | MBBS | public  | 5 |
| 691 | M | 23 | MBBS | public  | 5 |
| 692 | M | 20 | MBBS | public  | 5 |
| 693 | F | 20 | MBBS | private | 2 |
| 694 | M | 20 | MBBS | private | 1 |
| 695 | F | 21 | MBBS | private | 1 |
| 696 | F | 23 | MBBS | pubic   | 3 |
| 697 | F | 19 | MBBS | private | 2 |
| 698 | M | 23 | MBBS | private | 3 |
| 699 | F | 20 | MBBS | private | 4 |
| 700 | F | 21 | MBBS | private | 4 |
| 701 | M | 19 | MBBS | public  | 1 |
| 702 | F | 19 | MBBS | public  | 2 |
| 703 | F | 18 | MBBS | public  | 5 |

|     |   |    |      |         |   |
|-----|---|----|------|---------|---|
| 704 | M | 19 | MBBS | public  | 5 |
| 705 | M | 20 | MBBS | Private | 2 |
| 706 | M | 20 | MBBS | Private | 2 |
| 707 | F | 21 | MBBS | Private | 3 |
| 708 | M | 20 | MBBS | Private | 1 |
| 709 | F | 23 | MBBS | public  | 2 |
| 710 | F | 22 | MBBS | public  | 1 |
| 711 | F | 22 | MBBS | public  | 2 |
| 712 | M | 21 | MBBS | public  | 4 |
| 713 | F | 20 | MBBS | private | 5 |
| 714 | F | 20 | MBBS | private | 1 |
| 715 | M | 21 | MBBS | private | 4 |
| 716 | F | 19 | MBBS | pubic   | 5 |
| 717 | F | 19 | MBBS | private | 1 |
| 718 | M | 19 | MBBS | private | 4 |
| 719 | M | 20 | MBBS | private | 2 |
| 720 | M | 23 | MBBS | private | 5 |
| 721 | F | 23 | MBBS | public  | 3 |
| 722 | M | 20 | MBBS | public  | 1 |
| 723 | F | 20 | MBBS | public  | 2 |
| 724 | F | 20 | MBBS | public  | 2 |
| 725 | F | 21 | MBBS | Private | 3 |
| 726 | M | 23 | MBBS | Private | 4 |
| 727 | F | 19 | MBBS | Private | 1 |
| 728 | F | 23 | MBBS | Private | 2 |
| 729 | M | 20 | MBBS | public  | 1 |
| 730 | F | 21 | MBBS | public  | 3 |
| 731 | F | 19 | MBBS | public  | 1 |
| 732 | M | 19 | MBBS | public  | 4 |
| 733 | M | 18 | MBBS | private | 4 |
| 734 | M | 19 | MBBS | private | 5 |
| 735 | F | 20 | MBBS | private | 5 |
| 736 | M | 20 | MBBS | pubic   | 5 |
| 737 | F | 21 | MBBS | private | 5 |
| 738 | F | 20 | MBBS | private | 2 |
| 739 | F | 23 | MBBS | private | 1 |
| 740 | M | 22 | MBBS | private | 1 |
| 741 | F | 22 | MBBS | public  | 3 |
| 742 | F | 21 | MBBS | public  | 2 |
| 743 | M | 20 | MBBS | public  | 3 |
| 744 | F | 20 | MBBS | public  | 4 |
| 745 | F | 21 | MBBS | Private | 4 |
| 746 | M | 19 | MBBS | Private | 1 |
| 747 | M | 19 | MBBS | Private | 2 |
| 748 | M | 19 | MBBS | Private | 5 |
| 749 | F | 20 | MBBS | public  | 5 |
| 750 | M | 23 | MBBS | public  | 2 |



|     |   |    |      |         |   |
|-----|---|----|------|---------|---|
| 751 | F | 23 | MBBS | public  | 2 |
| 752 | F | 20 | MBBS | public  | 3 |
| 753 | F | 20 | MBBS | private | 1 |
| 754 | M | 20 | MBBS | private | 2 |
| 755 | F | 21 | MBBS | private | 1 |
| 756 | F | 23 | MBBS | pubic   | 2 |
| 757 | M | 19 | MBBS | private | 4 |
| 758 | F | 23 | MBBS | private | 5 |
| 759 | F | 20 | MBBS | private | 1 |
| 760 | M | 21 | MBBS | private | 4 |
| 761 | M | 19 | MBBS | public  | 5 |
| 762 | M | 19 | MBBS | public  | 1 |
| 763 | F | 18 | MBBS | public  | 4 |
| 764 | M | 19 | MBBS | public  | 2 |
| 765 | F | 20 | MBBS | Private | 5 |
| 766 | F | 20 | MBBS | Private | 3 |
| 767 | F | 21 | MBBS | Private | 1 |
| 768 | M | 20 | MBBS | Private | 2 |
| 769 | F | 23 | MBBS | public  | 2 |
| 770 | F | 22 | MBBS | public  | 3 |
| 771 | M | 22 | MBBS | public  | 4 |
| 772 | F | 21 | MBBS | public  | 1 |
| 773 | F | 20 | MBBS | private | 2 |
| 774 | M | 20 | MBBS | private | 1 |
| 775 | M | 21 | MBBS | private | 3 |
| 776 | M | 19 | MBBS | pubic   | 1 |
| 777 | F | 19 | MBBS | private | 4 |
| 778 | M | 19 | MBBS | private | 4 |
| 779 | F | 20 | MBBS | private | 5 |
| 780 | F | 23 | MBBS | private | 5 |
| 781 | F | 23 | MBBS | public  | 5 |
| 782 | M | 20 | MBBS | public  | 5 |
| 783 | F | 20 | MBBS | public  | 2 |
| 784 | F | 20 | MBBS | public  | 1 |
| 785 | M | 21 | MBBS | Private | 1 |
| 786 | F | 23 | MBBS | Private | 3 |
| 787 | F | 19 | MBBS | Private | 2 |
| 788 | M | 23 | MBBS | Private | 3 |
| 789 | M | 20 | MBBS | public  | 4 |
| 790 | M | 21 | MBBS | public  | 4 |
| 791 | F | 19 | MBBS | public  | 1 |
| 792 | M | 19 | MBBS | public  | 2 |
| 793 | F | 18 | MBBS | private | 5 |
| 794 | F | 19 | MBBS | private | 5 |
| 795 | F | 20 | MBBS | private | 2 |
| 796 | M | 20 | MBBS | pubic   | 2 |
| 797 | F | 21 | MBBS | private | 3 |

|     |   |    |      |         |   |
|-----|---|----|------|---------|---|
| 798 | F | 20 | MBBS | private | 1 |
| 799 | M | 23 | MBBS | private | 2 |
| 800 | F | 22 | MBBS | private | 1 |
| 801 | F | 22 | MBBS | public  | 2 |
| 802 | M | 21 | MBBS | public  | 4 |
| 803 | M | 20 | MBBS | public  | 5 |
| 804 | M | 20 | MBBS | public  | 1 |
| 805 | F | 21 | MBBS | Private | 4 |
| 806 | M | 19 | MBBS | Private | 5 |
| 807 | F | 19 | MBBS | Private | 1 |
| 808 | F | 19 | MBBS | Private | 4 |
| 809 | F | 20 | MBBS | public  | 2 |
| 810 | M | 23 | MBBS | public  | 5 |
| 811 | F | 23 | MBBS | public  | 3 |
| 812 | F | 20 | MBBS | public  | 1 |
| 813 | M | 20 | MBBS | private | 2 |
| 814 | F | 20 | MBBS | private | 2 |
| 815 | F | 21 | MBBS | private | 3 |
| 816 | M | 23 | MBBS | pubic   | 4 |
| 817 | M | 19 | MBBS | private | 1 |
| 818 | M | 23 | MBBS | private | 2 |
| 819 | F | 20 | MBBS | private | 1 |
| 820 | M | 21 | MBBS | private | 3 |
| 821 | F | 19 | MBBS | public  | 1 |
| 822 | F | 19 | MBBS | public  | 4 |
| 823 | F | 18 | MBBS | public  | 4 |
| 824 | M | 19 | MBBS | public  | 5 |
| 825 | F | 20 | MBBS | Private | 5 |
| 826 | F | 20 | MBBS | Private | 5 |
| 827 | M | 21 | MBBS | Private | 5 |
| 828 | F | 20 | MBBS | Private | 2 |
| 829 | F | 23 | MBBS | public  | 1 |
| 830 | M | 22 | MBBS | public  | 1 |
| 831 | M | 22 | MBBS | public  | 3 |
| 832 | M | 21 | MBBS | public  | 2 |
| 833 | F | 20 | MBBS | private | 3 |
| 834 | M | 20 | MBBS | private | 4 |
| 835 | F | 21 | MBBS | private | 4 |
| 836 | F | 19 | MBBS | pubic   | 1 |
| 837 | F | 19 | MBBS | private | 2 |
| 838 | M | 19 | MBBS | private | 5 |
| 839 | F | 20 | MBBS | private | 5 |
| 840 | F | 23 | MBBS | private | 2 |
| 841 | M | 23 | MBBS | public  | 2 |
| 842 | F | 20 | MBBS | public  | 3 |
| 843 | F | 20 | MBBS | public  | 1 |
| 844 | M | 20 | MBBS | public  | 2 |

|     |   |    |      |         |   |
|-----|---|----|------|---------|---|
| 845 | M | 21 | MBBS | Private | 1 |
| 846 | M | 23 | MBBS | Private | 2 |
| 847 | F | 19 | MBBS | Private | 4 |
| 848 | M | 23 | MBBS | Private | 5 |
| 849 | F | 20 | MBBS | public  | 1 |
| 850 | F | 21 | MBBS | public  | 4 |
| 851 | F | 19 | MBBS | public  | 5 |
| 852 | M | 19 | MBBS | public  | 1 |
| 853 | F | 18 | MBBS | private | 4 |
| 854 | F | 19 | MBBS | private | 2 |
| 855 | M | 20 | MBBS | private | 5 |
| 856 | F | 20 | MBBS | pubic   | 3 |
| 857 | F | 21 | MBBS | private | 1 |
| 858 | M | 20 | MBBS | private | 2 |
| 859 | M | 23 | MBBS | private | 2 |
| 860 | M | 22 | MBBS | private | 3 |
| 861 | F | 22 | MBBS | public  | 4 |
| 862 | M | 21 | MBBS | public  | 1 |
| 863 | F | 20 | MBBS | public  | 2 |
| 864 | F | 20 | MBBS | public  | 1 |
| 865 | F | 21 | MBBS | Private | 3 |
| 866 | M | 19 | MBBS | Private | 1 |
| 867 | F | 19 | MBBS | Private | 4 |
| 868 | F | 19 | MBBS | Private | 4 |
| 869 | M | 20 | MBBS | public  | 5 |
| 870 | F | 23 | MBBS | public  | 5 |
| 871 | F | 23 | MBBS | public  | 5 |
| 872 | M | 20 | MBBS | public  | 5 |
| 873 | M | 20 | MBBS | private | 2 |
| 874 | M | 20 | MBBS | private | 1 |
| 875 | F | 21 | MBBS | private | 1 |
| 876 | M | 23 | MBBS | pubic   | 3 |
| 877 | F | 19 | MBBS | private | 2 |
| 878 | F | 23 | MBBS | private | 3 |
| 879 | F | 20 | MBBS | private | 4 |
| 880 | M | 21 | MBBS | private | 4 |
| 881 | F | 19 | MBBS | public  | 1 |
| 882 | F | 19 | MBBS | public  | 2 |
| 883 | M | 18 | MBBS | public  | 5 |
| 884 | F | 19 | MBBS | public  | 5 |
| 885 | F | 20 | MBBS | Private | 2 |
| 886 | M | 20 | MBBS | Private | 2 |
| 887 | M | 21 | MBBS | Private | 3 |
| 888 | M | 20 | MBBS | Private | 1 |
| 889 | F | 23 | MBBS | public  | 2 |
| 890 | M | 22 | MBBS | public  | 1 |
| 891 | F | 22 | MBBS | public  | 2 |

|     |   |    |      |         |   |
|-----|---|----|------|---------|---|
| 892 | F | 21 | MBBS | public  | 4 |
| 893 | F | 20 | MBBS | private | 5 |
| 894 | M | 20 | MBBS | private | 1 |
| 895 | F | 21 | MBBS | private | 4 |
| 896 | F | 19 | MBBS | pubic   | 5 |
| 897 | M | 19 | MBBS | private | 1 |
| 898 | F | 19 | MBBS | private | 4 |
| 899 | F | 20 | MBBS | private | 2 |
| 900 | M | 23 | MBBS | private | 5 |
| 901 | M | 23 | MBBS | public  | 3 |
| 902 | M | 20 | MBBS | public  | 1 |
| 903 | F | 20 | MBBS | public  | 2 |
| 904 | M | 20 | MBBS | public  | 2 |
| 905 | F | 21 | MBBS | Private | 3 |
| 906 | F | 23 | MBBS | Private | 4 |
| 907 | F | 19 | MBBS | Private | 1 |
| 908 | M | 23 | MBBS | Private | 2 |
| 909 | F | 20 | MBBS | public  | 1 |
| 910 | F | 21 | MBBS | public  | 3 |
| 911 | M | 19 | MBBS | public  | 1 |
| 912 | F | 19 | MBBS | public  | 4 |
| 913 | F | 18 | MBBS | private | 4 |
| 914 | M | 19 | MBBS | private | 5 |
| 915 | M | 20 | MBBS | private | 5 |
| 916 | M | 20 | MBBS | pubic   | 5 |
| 917 | F | 21 | MBBS | private | 5 |
| 918 | M | 20 | MBBS | private | 2 |
| 919 | F | 23 | MBBS | private | 1 |
| 920 | F | 22 | MBBS | private | 1 |
| 921 | F | 22 | MBBS | public  | 3 |
| 922 | M | 21 | MBBS | public  | 2 |
| 923 | F | 20 | MBBS | public  | 3 |
| 924 | F | 20 | MBBS | public  | 4 |
| 925 | M | 21 | MBBS | private | 4 |
| 926 | F | 19 | MBBS | private | 1 |
| 927 | F | 19 | MBBS | private | 2 |
| 928 | M | 19 | MBBS | pubic   | 5 |
| 929 | M | 20 | MBBS | private | 5 |
| 930 | M | 23 | MBBS | private | 2 |
| 931 | F | 23 | MBBS | private | 2 |
| 932 | M | 20 | MBBS | private | 3 |
| 933 | F | 20 | MBBS | public  | 1 |
| 934 | F | 20 | MBBS | public  | 2 |
| 935 | F | 21 | MBBS | public  | 1 |
| 936 | M | 23 | MBBS | public  | 2 |
| 937 | F | 19 | MBBS | Private | 4 |
| 938 | F | 23 | MBBS | Private | 5 |

|     |   |    |      |         |   |
|-----|---|----|------|---------|---|
| 939 | M | 20 | MBBS | Private | 1 |
| 940 | F | 21 | MBBS | Private | 4 |
| 941 | F | 19 | MBBS | public  | 5 |
| 942 | M | 19 | MBBS | public  | 1 |
| 943 | M | 18 | MBBS | public  | 4 |
| 944 | M | 19 | MBBS | public  | 2 |
| 945 | F | 20 | MBBS | private | 5 |
| 946 | M | 20 | MBBS | private | 3 |
| 947 | F | 21 | MBBS | private | 1 |
| 948 | F | 20 | MBBS | pubic   | 2 |
| 949 | F | 23 | MBBS | private | 2 |
| 950 | M | 22 | MBBS | private | 3 |
| 951 | F | 22 | MBBS | private | 4 |
| 952 | F | 21 | MBBS | private | 1 |
| 953 | M | 20 | MBBS | public  | 2 |
| 954 | F | 20 | MBBS | public  | 1 |
| 955 | F | 21 | MBBS | public  | 3 |
| 956 | M | 19 | MBBS | public  | 1 |
| 957 | M | 19 | MBBS | Private | 4 |
| 958 | M | 19 | MBBS | Private | 4 |
| 959 | F | 20 | MBBS | Private | 5 |
| 960 | M | 23 | MBBS | Private | 5 |
| 961 | F | 23 | MBBS | public  | 5 |
| 962 | F | 20 | MBBS | public  | 5 |
| 963 | F | 20 | MBBS | public  | 2 |
| 964 | M | 20 | MBBS | public  | 1 |
| 965 | F | 21 | MBBS | private | 1 |
| 966 | F | 23 | MBBS | private | 3 |
| 967 | M | 19 | MBBS | private | 2 |
| 968 | F | 23 | MBBS | pubic   | 3 |
| 969 | F | 20 | MBBS | private | 4 |
| 970 | M | 21 | MBBS | private | 4 |
| 971 | M | 19 | MBBS | private | 1 |
| 972 | M | 19 | MBBS | private | 2 |
| 973 | F | 18 | MBBS | public  | 5 |
| 974 | M | 19 | MBBS | public  | 5 |
| 975 | F | 20 | MBBS | public  | 2 |
| 976 | F | 20 | MBBS | public  | 2 |
| 977 | F | 21 | MBBS | Private | 3 |
| 978 | M | 20 | MBBS | Private | 1 |
| 979 | F | 23 | MBBS | Private | 2 |
| 980 | F | 22 | MBBS | Private | 1 |
| 981 | M | 22 | MBBS | public  | 2 |
| 982 | F | 21 | BDS  | public  | 4 |
| 983 | F | 20 | BDS  | public  | 4 |
| 984 | M | 20 | BDS  | public  | 1 |
| 985 | M | 21 | BDS  | private | 4 |

|      |   |    |     |         |   |
|------|---|----|-----|---------|---|
| 986  | M | 19 | BDS | private | 2 |
| 987  | F | 19 | BDS | private | 1 |
| 988  | M | 19 | BDS | pubic   | 4 |
| 989  | F | 20 | BDS | private | 2 |
| 990  | F | 23 | BDS | private | 2 |
| 991  | F | 23 | BDS | private | 3 |
| 992  | M | 20 | BDS | private | 4 |
| 993  | F | 20 | BDS | public  | 4 |
| 994  | F | 20 | BDS | public  | 1 |
| 995  | M | 21 | BDS | public  | 4 |
| 996  | F | 23 | BDS | public  | 2 |
| 997  | F | 19 | BDS | Private | 1 |
| 998  | M | 23 | BDS | Private | 4 |
| 999  | M | 20 | BDS | Private | 2 |
| 1000 | M | 21 | BDS | Private | 2 |
| 1001 | F | 19 | BDS | public  | 3 |
| 1002 | M | 19 | BDS | public  | 4 |
| 1003 | F | 18 | BDS | public  | 4 |
| 1004 | F | 19 | BDS | public  | 1 |
| 1005 | F | 20 | BDS | private | 4 |
| 1006 | M | 20 | BDS | private | 2 |
| 1007 | F | 21 | BDS | private | 1 |
| 1008 | F | 20 | BDS | pubic   | 4 |
| 1009 | M | 23 | BDS | private | 2 |
| 1010 | F | 22 | BDS | private | 2 |
| 1011 | F | 22 | BDS | private | 3 |
| 1012 | M | 21 | BDS | private | 4 |
| 1013 | M | 20 | BDS | public  | 2 |
| 1014 | M | 20 | BDS | public  | 1 |
| 1015 | F | 21 | BDS | public  | 4 |
| 1016 | M | 19 | BDS | public  | 2 |
| 1017 | F | 19 | BDS | Private | 1 |
| 1018 | F | 19 | BDS | Private | 4 |
| 1019 | F | 20 | BDS | Private | 2 |
| 1020 | M | 23 | BDS | Private | 2 |
| 1021 | F | 23 | BDS | public  | 3 |
| 1022 | F | 20 | BDS | public  | 4 |
| 1023 | M | 20 | BDS | public  | 1 |
| 1024 | F | 20 | BDS | public  | 4 |
| 1025 | F | 21 | BDS | private | 2 |
| 1026 | M | 23 | BDS | private | 1 |
| 1027 | M | 19 | BDS | private | 4 |
| 1028 | M | 23 | BDS | pubic   | 2 |
| 1029 | F | 20 | BDS | private | 2 |
| 1030 | M | 21 | BDS | private | 3 |
| 1031 | F | 19 | BDS | private | 4 |
| 1032 | F | 19 | BDS | private | 4 |

|      |   |    |     |         |   |
|------|---|----|-----|---------|---|
| 1033 | F | 18 | BDS | public  | 1 |
| 1034 | M | 19 | BDS | public  | 4 |
| 1035 | F | 20 | BDS | public  | 2 |
| 1036 | F | 20 | BDS | public  | 1 |
| 1037 | M | 21 | BDS | Private | 4 |
| 1038 | F | 20 | BDS | Private | 2 |
| 1039 | F | 23 | BDS | Private | 2 |
| 1040 | M | 22 | BDS | Private | 3 |
| 1041 | M | 22 | BDS | public  | 4 |
| 1042 | M | 21 | BDS | public  | 4 |
| 1043 | F | 20 | BDS | public  | 1 |
| 1044 | M | 20 | BDS | public  | 4 |
| 1045 | F | 21 | BDS | private | 2 |
| 1046 | F | 19 | BDS | private | 1 |
| 1047 | F | 19 | BDS | private | 4 |
| 1048 | M | 19 | BDS | pubic   | 2 |
| 1049 | F | 20 | BDS | private | 2 |
| 1050 | F | 23 | BDS | private | 3 |
| 1051 | M | 23 | BDS | private | 4 |
| 1052 | F | 20 | BDS | private | 2 |
| 1053 | F | 20 | BDS | public  | 1 |
| 1054 | M | 20 | BDS | public  | 4 |
| 1055 | M | 21 | BDS | public  | 2 |
| 1056 | M | 23 | BDS | public  | 1 |
| 1057 | F | 19 | BDS | Private | 4 |
| 1058 | M | 23 | BDS | Private | 2 |
| 1059 | F | 20 | BDS | Private | 2 |
| 1060 | F | 21 | BDS | Private | 3 |
| 1061 | F | 19 | BDS | public  | 4 |
| 1062 | M | 19 | BDS | public  | 1 |
| 1063 | F | 18 | BDS | public  | 4 |
| 1064 | F | 19 | BDS | public  | 2 |
| 1065 | M | 20 | BDS | private | 1 |
| 1066 | F | 20 | BDS | private | 4 |
| 1067 | F | 21 | BDS | private | 2 |
| 1068 | M | 20 | BDS | pubic   | 2 |
| 1069 | M | 23 | BDS | private | 3 |
| 1070 | M | 22 | BDS | private | 4 |
| 1071 | F | 22 | BDS | private | 4 |
| 1072 | M | 21 | BDS | private | 1 |
| 1073 | F | 20 | BDS | public  | 4 |
| 1074 | F | 20 | BDS | public  | 2 |
| 1075 | F | 21 | BDS | public  | 1 |
| 1076 | M | 19 | BDS | public  | 4 |
| 1077 | F | 19 | BDS | Private | 2 |
| 1078 | F | 19 | BDS | Private | 2 |
| 1079 |   | 20 | BDS | Private | 3 |

|      |   |    |     |         |   |
|------|---|----|-----|---------|---|
| 1080 | F | 23 | BDS | Private | 4 |
| 1081 | M | 23 | BDS | public  | 4 |
| 1082 | F | 20 | BDS | public  | 1 |
| 1083 | F | 20 | BDS | public  | 4 |
| 1084 | M | 20 | BDS | public  | 2 |
| 1085 | F | 21 | BDS | private | 1 |
| 1086 | F | 23 | BDS | private | 4 |
| 1087 | M | 19 | BDS | private | 2 |
| 1088 | M | 23 | BDS | pubic   | 2 |
| 1089 | M | 20 | BDS | private | 3 |
| 1090 | F | 21 | BDS | private | 4 |
| 1091 | M | 19 | BDS | private | 2 |
| 1092 | F | 19 | BDS | private | 1 |
| 1093 | F | 18 | BDS | public  | 4 |
| 1094 | F | 19 | BDS | public  | 2 |
| 1095 | M | 20 | BDS | public  | 1 |
| 1096 | F | 20 | BDS | public  | 4 |
| 1097 | F | 21 | BDS | Private | 2 |
| 1098 | M | 20 | BDS | Private | 2 |
| 1099 | F | 23 | BDS | Private | 3 |
| 1100 | F | 22 | BDS | Private | 4 |
| 1101 | M | 22 | BDS | public  | 1 |
| 1102 | M | 21 | BDS | public  | 4 |
| 1103 | M | 20 | BDS | public  | 2 |
| 1104 | F | 20 | BDS | public  | 1 |
| 1105 | M | 21 | BDS | private | 4 |
| 1106 | F | 19 | BDS | private | 2 |
| 1107 | F | 19 | BDS | private | 2 |
| 1108 | F | 19 | BDS | pubic   | 3 |
| 1109 | M | 20 | BDS | private | 4 |
| 1110 | F | 23 | BDS | private | 4 |
| 1111 | F | 23 | BDS | private | 1 |
| 1112 | M | 20 | BDS | private | 4 |
| 1113 | F | 20 | BDS | public  | 2 |
| 1114 | F | 20 | BDS | public  | 1 |
| 1115 | M | 21 | BDS | public  | 4 |
| 1116 | M | 23 | BDS | public  | 2 |
| 1117 | M | 19 | BDS | Private | 2 |
| 1118 | F | 23 | BDS | Private | 3 |
| 1119 | M | 20 | BDS | Private | 4 |
| 1120 | F | 21 | BDS | Private | 4 |
| 1121 | F | 19 | BDS | public  | 1 |
| 1122 | F | 19 | BDS | public  | 4 |
| 1123 | M | 18 | BDS | public  | 2 |
| 1124 | F | 19 | BDS | public  | 1 |
| 1125 | F | 20 | BDS | private | 4 |
| 1126 | M | 20 | BDS | private | 2 |



|      |   |    |     |         |   |
|------|---|----|-----|---------|---|
| 1127 | F | 21 | BDS | private | 2 |
| 1128 | F | 20 | BDS | pubic   | 3 |
| 1129 | M | 23 | BDS | private | 4 |
| 1130 | M | 22 | BDS | private | 2 |
| 1131 | M | 22 | BDS | private | 1 |
| 1132 | F | 21 | BDS | private | 4 |
| 1133 | M | 20 | BDS | public  | 2 |
| 1134 | F | 20 | BDS | public  | 1 |
| 1135 | F | 21 | BDS | public  | 4 |
| 1136 | F | 19 | BDS | public  | 2 |
| 1137 | M | 19 | BDS | Private | 2 |
| 1138 | F | 19 | BDS | Private | 3 |
| 1139 | F | 20 | BDS | Private | 4 |
| 1140 | M | 23 | BDS | Private | 1 |
| 1141 | F | 23 | BDS | public  | 4 |
| 1142 | F | 20 | BDS | public  | 2 |
| 1143 | M | 20 | BDS | public  | 1 |
| 1144 | M | 20 | BDS | public  | 4 |
| 1145 | M | 21 | BDS | private | 2 |
| 1146 | F | 23 | BDS | private | 2 |
| 1147 | M | 19 | BDS | private | 3 |
| 1148 | F | 23 | BDS | pubic   | 4 |
| 1149 | F | 20 | BDS | private | 4 |
| 1150 | F | 21 | BDS | private | 1 |
| 1151 | M | 19 | BDS | private | 4 |
| 1152 | F | 19 | BDS | private | 2 |
| 1153 | F | 18 | BDS | public  | 1 |
| 1154 | M | 19 | BDS | public  | 4 |
| 1155 | F | 20 | BDS | public  | 2 |
| 1156 | F | 20 | BDS | public  | 2 |
| 1157 | M | 21 | BDS | Private | 3 |
| 1158 | M | 20 | BDS | Private | 4 |
| 1159 | M | 23 | BDS | Private | 4 |
| 1160 | F | 22 | BDS | Private | 1 |
| 1161 | M | 22 | BDS | public  | 4 |
| 1162 | F | 21 | BDS | public  | 2 |
| 1163 | F | 20 | BDS | public  | 1 |
| 1164 | F | 20 | BDS | public  | 4 |
| 1165 | M | 21 | BDS | private | 2 |
| 1166 | F | 19 | BDS | private | 2 |
| 1167 | F | 19 | BDS | private | 3 |
| 1168 | M | 19 | BDS | pubic   | 4 |
| 1169 | F | 20 | BDS | private | 2 |
| 1170 | F | 23 | BDS | private | 1 |
| 1171 | M | 23 | BDS | private | 4 |
| 1172 | M | 20 | BDS | private | 2 |
| 1173 | M | 20 | BDS | public  | 1 |

|      |   |    |     |         |   |
|------|---|----|-----|---------|---|
| 1174 | F | 20 | BDS | public  | 4 |
| 1175 | M | 21 | BDS | public  | 2 |
| 1176 | F | 23 | BDS | public  | 2 |
| 1177 | F | 19 | BDS | Private | 3 |
| 1178 | F | 23 | BDS | Private | 4 |
| 1179 | M | 20 | BDS | Private | 1 |
| 1180 | F | 21 | BDS | Private | 4 |
| 1181 | F | 19 | BDS | public  | 2 |
| 1182 | M | 19 | BDS | public  | 1 |
| 1183 | F | 18 | BDS | public  | 4 |
| 1184 | F | 19 | BDS | public  | 2 |
| 1185 | M | 20 | BDS | private | 2 |
| 1186 | M | 20 | BDS | private | 3 |
| 1187 | M | 21 | BDS | private | 4 |
| 1188 | F | 20 | BDS | pubic   | 4 |
| 1189 | M | 23 | BDS | private | 1 |
| 1190 | F | 22 | BDS | private | 4 |
| 1191 | F | 22 | BDS | private | 2 |
| 1192 | F | 21 | BDS | private | 1 |
| 1193 | M | 20 | BDS | public  | 4 |
| 1194 | F | 20 | BDS | public  | 2 |
| 1195 | F | 21 | BDS | public  | 2 |
| 1196 |   | 19 | BDS | public  | 3 |
| 1197 | F | 19 | BDS | private | 4 |
| 1198 | M | 19 | BDS | private | 4 |
| 1199 | F | 20 | BDS | private | 1 |
| 1200 | F | 23 | BDS | pubic   | 4 |
| 1201 | M | 23 | BDS | private | 2 |
| 1202 | F | 20 | BDS | private | 1 |
| 1203 | F | 20 | BDS | private | 4 |
| 1204 | M | 20 | BDS | private | 2 |
| 1205 | M | 21 | BDS | public  | 2 |
| 1206 | M | 23 | BDS | public  | 3 |
| 1207 | F | 19 | BDS | public  | 4 |
| 1208 | M | 23 | BDS | public  | 2 |
| 1209 | F | 20 | BDS | Private | 1 |
| 1210 | F | 21 | BDS | Private | 4 |
| 1211 | F | 19 | BDS | Private | 2 |
| 1212 | M | 19 | BDS | Private | 1 |
| 1213 | F | 18 | BDS | public  | 4 |
| 1214 | F | 19 | BDS | public  | 2 |
| 1215 | M | 20 | BDS | public  | 2 |
| 1216 | F | 20 | BDS | public  | 3 |
| 1217 | F | 21 | BDS | private | 4 |
| 1218 | M | 20 | BDS | private | 1 |
| 1219 | M | 23 | BDS | private | 4 |
| 1220 | M | 22 | BDS | pubic   | 2 |

|      |   |    |     |         |   |
|------|---|----|-----|---------|---|
| 1221 | F | 22 | BDS | private | 1 |
| 1222 | M | 21 | BDS | private | 4 |
| 1223 | F | 20 | BDS | private | 2 |
| 1224 | F | 20 | BDS | private | 2 |
| 1225 | F | 21 | BDS | public  | 3 |
| 1226 | M | 19 | BDS | public  | 4 |
| 1227 | F | 19 | BDS | public  | 4 |
| 1228 | F | 19 | BDS | public  | 1 |
| 1229 | M | 20 | BDS | Private | 4 |
| 1230 | F | 23 | BDS | Private | 2 |
| 1231 | F | 23 | BDS | Private | 1 |
| 1232 | M | 20 | BDS | Private | 4 |
| 1233 | M | 20 | BDS | public  | 2 |
| 1234 | M | 20 | BDS | public  | 2 |
| 1235 | F | 21 | BDS | public  | 3 |
| 1236 | M | 23 | BDS | public  | 4 |
| 1237 | F | 19 | BDS | private | 4 |
| 1238 | F | 23 | BDS | private | 1 |
| 1239 | F | 20 | BDS | private | 4 |
| 1240 | M | 21 | BDS | pubic   | 2 |
| 1241 | F | 19 | BDS | private | 1 |
| 1242 | F | 19 | BDS | private | 4 |
| 1243 | M | 18 | BDS | private | 2 |
| 1244 | F | 19 | BDS | private | 2 |
| 1245 | F | 20 | BDS | public  | 3 |
| 1246 | M | 20 | BDS | public  | 4 |
| 1247 | M | 21 | BDS | public  | 2 |
| 1248 | M | 20 | BDS | public  | 1 |
| 1249 | F | 23 | BDS | Private | 4 |
| 1250 | M | 22 | BDS | Private | 2 |
| 1251 | F | 22 | BDS | Private | 1 |
| 1252 | F | 21 | BDS | Private | 4 |
| 1253 | F | 20 | BDS | public  | 2 |
| 1254 | M | 20 | BDS | public  | 2 |
| 1255 | F | 21 | BDS | public  | 3 |
| 1256 | F | 19 | BDS | public  | 4 |
| 1257 | M | 19 | BDS | private | 1 |
| 1258 | F | 19 | BDS | private | 4 |
| 1259 | F | 20 | BDS | private | 2 |
| 1260 | M | 23 | BDS | pubic   | 1 |
| 1261 | M | 23 | BDS | private | 4 |
| 1262 | M | 20 | BDS | private | 2 |
| 1263 | F | 20 | BDS | private | 2 |
| 1264 | M | 20 | BDS | private | 3 |
| 1265 | F | 21 | BDS | public  | 4 |
| 1266 | F | 23 | BDS | public  | 4 |
| 1267 | F | 19 | BDS | public  | 1 |

|      |   |    |     |         |   |
|------|---|----|-----|---------|---|
| 1268 | M | 23 | BDS | public  | 4 |
| 1269 | F | 20 | BDS | Private | 2 |
| 1270 | F | 21 | BDS | Private | 1 |
| 1271 | M | 19 | BDS | Private | 4 |
| 1272 | F | 19 | BDS | Private | 2 |
| 1273 | F | 18 | BDS | public  | 2 |
| 1274 | M | 19 | BDS | public  | 3 |
| 1275 | M | 20 | BDS | public  | 4 |
| 1276 | M | 20 | BDS | public  | 4 |
| 1277 | F | 21 | BDS | private | 1 |
| 1278 | M | 20 | BDS | private | 4 |
| 1279 | F | 23 | BDS | private | 2 |
| 1280 | F | 22 | BDS | pubic   | 1 |
| 1281 | F | 22 | BDS | private | 4 |
| 1282 | M | 21 | BDS | private | 2 |
| 1283 | F | 20 | BDS | private | 2 |
| 1284 | F | 20 | BDS | private | 3 |
| 1285 | M | 21 | BDS | public  | 4 |
| 1286 | F | 19 | BDS | public  | 2 |
| 1287 | F | 19 | BDS | public  | 1 |
| 1288 | M | 19 | BDS | public  | 4 |
| 1289 | M | 20 | BDS | Private | 2 |
| 1290 | M | 23 | BDS | Private | 1 |
| 1291 | F | 23 | BDS | Private | 4 |
| 1292 | M | 20 | BDS | Private | 2 |
| 1293 | F | 20 | BDS | public  | 2 |
| 1294 | F | 20 | BDS | public  | 3 |
| 1295 | F | 21 | BDS | public  | 4 |
| 1296 | M | 23 | BDS | public  | 1 |
| 1297 | F | 19 | BDS | private | 4 |
| 1298 | F | 23 | BDS | private | 2 |
| 1299 | M | 20 | BDS | private | 1 |
| 1300 | F | 21 | BDS | pubic   | 4 |
| 1301 | F | 19 | BDS | private | 2 |
| 1302 | M | 19 | BDS | private | 2 |
| 1303 | M | 18 | BDS | private | 3 |
| 1304 | M | 19 | BDS | private | 4 |
| 1305 | F | 20 | BDS | public  | 4 |
| 1306 | M | 20 | BDS | public  | 1 |
| 1307 | F | 21 | BDS | public  | 4 |
| 1308 | F | 20 | BDS | public  | 2 |
| 1309 | F | 23 | BDS | Private | 1 |
| 1310 | M | 22 | BDS | Private | 4 |
| 1311 | F | 22 | BDS | Private | 2 |
| 1312 | F | 21 | BDS | Private | 2 |
| 1313 |   | 20 | BDS | public  | 3 |
| 1314 | F | 20 | BDS | public  | 4 |

|      |   |    |     |         |   |
|------|---|----|-----|---------|---|
| 1315 | M | 21 | BDS | public  | 4 |
| 1316 | F | 19 | BDS | public  | 1 |
| 1317 | F | 19 | BDS | private | 4 |
| 1318 | M | 19 | BDS | private | 2 |
| 1319 | F | 20 | BDS | private | 1 |
| 1320 | F | 23 | BDS | pubic   | 4 |
| 1321 | M | 23 | BDS | private | 2 |
| 1322 | M | 20 | BDS | private | 2 |
| 1323 | M | 20 | BDS | private | 3 |
| 1324 | F | 20 | BDS | private | 4 |
| 1325 | M | 21 | BDS | public  | 2 |
| 1326 | F | 23 | BDS | public  | 1 |
| 1327 | F | 19 | BDS | public  | 4 |
| 1328 | F | 23 | BDS | public  | 2 |
| 1329 | M | 20 | BDS | Private | 1 |
| 1330 | F | 21 | BDS | Private | 4 |
| 1331 | F | 19 | BDS | Private | 2 |
| 1332 | M | 19 | BDS | Private | 2 |
| 1333 | F | 18 | BDS | public  | 3 |
| 1334 | F | 19 | BDS | public  | 4 |
| 1335 | M | 20 | BDS | public  | 1 |
| 1336 | M | 20 | BDS | public  | 4 |
| 1337 | M | 21 | BDS | private | 2 |
| 1338 | F | 20 | BDS | private | 1 |
| 1339 | M | 23 | BDS | private | 4 |
| 1340 | F | 22 | BDS | pubic   | 2 |
| 1341 | F | 22 | BDS | private | 2 |
| 1342 | F | 21 | BDS | private | 3 |
| 1343 | M | 20 | BDS | private | 4 |
| 1344 | F | 20 | BDS | private | 4 |
| 1345 | F | 21 | BDS | public  | 1 |
| 1346 | M | 19 | BDS | public  | 4 |
| 1347 | F | 19 | BDS | public  | 2 |
| 1348 | F | 19 | BDS | public  | 1 |
| 1349 | M | 20 | BDS | Private | 4 |
| 1350 | M | 23 | BDS | Private | 2 |
| 1351 | M | 23 | BDS | Private | 2 |
| 1352 | F | 20 | BDS | Private | 3 |
| 1353 | M | 20 | BDS | public  | 4 |
| 1354 | F | 20 | BDS | public  | 4 |
| 1355 | F | 21 | BDS | public  | 1 |
| 1356 | F | 23 | BDS | public  | 4 |
| 1357 | M | 19 | BDS | private | 2 |
| 1358 | F | 23 | BDS | private | 1 |
| 1359 | F | 20 | BDS | private | 4 |
| 1360 | M | 21 | BDS | pubic   | 2 |
| 1361 | F | 19 | BDS | private | 2 |

|      |   |    |     |         |   |
|------|---|----|-----|---------|---|
| 1362 | F | 19 | BDS | private | 3 |
| 1363 | M | 18 | BDS | private | 4 |
| 1364 | M | 19 | BDS | private | 2 |
| 1365 | M | 20 | BDS | public  | 1 |
| 1366 | F | 20 | BDS | public  | 4 |
| 1367 | M | 21 | BDS | public  | 2 |
| 1368 | F | 20 | BDS | public  | 1 |
| 1369 | F | 23 | BDS | Private | 4 |
| 1370 | F | 22 | BDS | Private | 2 |
| 1371 | M | 22 | BDS | Private | 2 |
| 1372 | F | 21 | BDS | Private | 3 |
| 1373 | F | 20 | BDS | public  | 4 |
| 1374 | M | 20 | BDS | public  | 1 |
| 1375 | F | 21 | BDS | public  | 4 |
| 1376 | F | 19 | BDS | public  | 2 |
| 1377 | M | 19 | BDS | private | 1 |
| 1378 | M | 19 | BDS | private | 4 |
| 1379 | M | 20 | BDS | private | 2 |
| 1380 | F | 23 | BDS | pubic   | 2 |
| 1381 | M | 23 | BDS | private | 3 |
| 1382 | F | 20 | BDS | private | 4 |
| 1383 | F | 20 | BDS | private | 4 |
| 1384 | F | 20 | BDS | private | 1 |
| 1385 | M | 21 | BDS | public  | 4 |
| 1386 | F | 23 | BDS | public  | 2 |
| 1387 | F | 19 | BDS | public  | 1 |
| 1388 | M | 23 | BDS | public  | 4 |
| 1389 | F | 20 | BDS | Private | 2 |
| 1390 | F | 21 | BDS | Private | 2 |
| 1391 | M | 19 | BDS | Private | 3 |
| 1392 | M | 19 | BDS | Private | 4 |
| 1393 | M | 18 | BDS | public  | 4 |
| 1394 | F | 19 | BDS | public  | 1 |
| 1395 | M | 20 | BDS | public  | 4 |
| 1396 | F | 20 | BDS | public  | 2 |
| 1397 | F | 21 | BDS | private | 1 |
| 1398 | F | 20 | BDS | private | 4 |
| 1399 | M | 23 | BDS | private | 2 |
| 1400 | F | 22 | BDS | pubic   | 2 |
| 1401 | F | 22 | BDS | private | 3 |
| 1402 | M | 21 | BDS | private | 4 |
| 1403 | F | 20 | BDS | private | 2 |
| 1404 | F | 20 | BDS | private | 1 |
| 1405 | M | 21 | BDS | public  | 4 |
| 1406 | M | 19 | BDS | public  | 2 |
| 1407 | M | 19 | BDS | public  | 1 |
| 1408 | F | 19 | BDS | public  | 4 |

|      |   |    |     |         |   |
|------|---|----|-----|---------|---|
| 1409 | M | 20 | BDS | Private | 2 |
| 1410 | F | 23 | BDS | Private | 2 |
| 1411 | F | 23 | BDS | Private | 3 |
| 1412 | F | 20 | BDS | Private | 4 |
| 1413 | M | 20 | BDS | public  | 1 |
| 1414 | F | 20 | BDS | public  | 4 |
| 1415 | F | 21 | BDS | public  | 2 |
| 1416 | M | 23 | BDS | public  | 1 |
| 1417 | F | 19 | BDS | private | 4 |
| 1418 | F | 23 | BDS | private | 2 |
| 1419 | M | 20 | BDS | private | 2 |
| 1420 | M | 21 | BDS | pubic   | 3 |
| 1421 | M | 19 | BDS | private | 4 |
| 1422 | F | 19 | BDS | private | 4 |
| 1423 | M | 18 | BDS | private | 1 |
| 1424 | F | 19 | BDS | private | 4 |
| 1425 | F | 20 | BDS | public  | 2 |
| 1426 | F | 20 | BDS | public  | 1 |
| 1427 | M | 21 | BDS | public  | 4 |
| 1428 | F | 20 | BDS | public  | 2 |
| 1429 | F | 23 | BDS | Private | 2 |
| 1430 | M | 22 | BDS | Private | 3 |
| 1431 | M | 22 | BDS | Private | 4 |
| 1432 | M | 21 | BDS | Private | 4 |
| 1433 | M | 20 | BDS | public  | 1 |
| 1434 | M | 20 | BDS | public  | 4 |
| 1435 | M | 21 | BDS | public  | 2 |
| 1436 | M | 19 | BDS | public  | 1 |
| 1437 | M | 19 | BDS | private | 4 |
| 1438 | M | 19 | BDS | private | 2 |
| 1439 | M | 20 | BDS | private | 2 |
| 1440 | M | 23 | BDS | pubic   | 3 |
| 1441 | M | 23 | BDS | private | 4 |
| 1442 | M | 19 | BDS | private | 2 |
| 1443 | M | 20 | BDS | private | 1 |
| 1444 | M | 22 | BDS | private | 4 |
| 1445 | M | 22 | BDS | public  | 2 |
| 1446 | M | 21 | BDS | public  | 1 |
| 1447 | M | 20 | BDS | public  | 4 |
| 1448 | M | 21 | BDS | public  | 2 |
| 1449 | M | 19 | BDS | Private | 2 |
| 1450 | F | 19 | BDS | Private | 3 |
| 1451 | F | 18 | BDS | Private | 2 |
| 1452 | F | 19 | BDS | Private | 3 |
| 1453 | F | 20 | BDS | public  | 4 |
| 1454 | F | 20 | BDS | public  | 4 |
| 1455 | F | 21 | BDS | public  | 1 |

|      |   |    |     |         |   |
|------|---|----|-----|---------|---|
| 1456 | F | 20 | BDS | public  | 4 |
| 1457 | F | 23 | BDS | private | 2 |
| 1458 | F | 22 | BDS | private | 1 |
| 1459 | F | 22 | BDS | private | 4 |
| 1460 | F | 21 | BDS | pubic   | 2 |
| 1461 | F | 20 | BDS | private | 2 |
| 1462 | F | 20 | BDS | private | 3 |
| 1463 | F | 21 | BDS | private | 4 |
| 1464 | F | 19 | BDS | private | 2 |
| 1465 | F | 19 | BDS | public  | 1 |
| 1466 | F | 19 | BDS | public  | 4 |
| 1467 | F | 20 | BDS | public  | 2 |
| 1468 | F | 23 | BDS | public  | 1 |
| 1469 | F | 23 | BDS | private | 4 |
| 1470 | F | 19 | BDS | private | 2 |
| 1471 | F | 20 | BDS | private | 2 |
| 1472 | F | 22 | BDS | pubic   | 3 |
| 1473 | F | 22 | BDS | private | 3 |



| Academic grade | Visual | Aural | Read/write | Kinesthetic | Student satisfaction |
|----------------|--------|-------|------------|-------------|----------------------|
| A              | 1      | 0     | 0          | 0           | yes                  |
| B              | 1      | 0     | 0          | 0           | no                   |
| B              | 0      | 1     | 0          | 0           | no                   |
| C              | 0      | 1     | 0          | 0           | no                   |
| D              | 1      | 0     | 0          | 0           | no                   |
| D              | 0      | 1     | 0          | 0           | yes                  |
| C              | 1      | 0     | 0          | 0           | no                   |
| C              | 0      | 1     | 0          | 0           | no                   |
| B              | 0      | 1     | 0          | 0           | no                   |
| B              | 1      | 0     | 0          | 0           | yes                  |
| B              | 0      | 1     | 0          | 0           | no                   |
| B              | 0      | 1     | 0          | 0           | no                   |
| B              | 1      | 0     | 0          | 0           | yes                  |
| B              | 0      | 1     | 0          | 0           | no                   |
| A              | 1      | 0     | 0          | 0           | no                   |
| C              | 1      | 0     | 0          | 0           | no                   |
| C              | 1      | 0     | 0          | 0           | no                   |
| D              | 0      | 1     | 1          | 0           | no                   |
| B              | 1      | 0     | 1          | 0           | no                   |
| B              | 1      | 0     | 0          | 0           | no                   |
| B              | 0      | 1     | 1          | 1           | yes                  |
| D              | 1      | 1     | 1          | 1           | yes                  |
| C              | 1      | 1     | 1          | 0           | no                   |
| A              | 1      | 1     | 0          | 0           | no                   |
| C              | 0      | 1     | 1          | 1           | no                   |
| D              | 1      | 1     | 1          | 1           | no                   |
| B              | 1      | 0     | 0          | 0           | no                   |
| B              | 1      | 1     | 1          | 1           | no                   |
| D              | 1      | 1     | 1          | 1           | no                   |
| C              | 0      | 1     | 1          | 0           | no                   |
| A              | 0      | 0     | 0          | 1           | no                   |
| B              | 1      | 1     | 1          | 1           | no                   |
| B              | 1      | 1     | 1          | 1           | no                   |
| D              | 1      | 1     | 1          | 0           | no                   |
| C              | 1      | 0     | 0          | 0           | no                   |
| C              | 0      | 1     | 1          | 1           | yes                  |
| D              | 0      | 1     | 1          | 0           | no                   |
| C              | 0      | 0     | 1          | 0           | no                   |
| C              | 1      | 0     | 0          | 1           | no                   |
| D              | 0      | 1     | 1          | 1           | no                   |
| D              | 1      | 1     | 1          | 1           | no                   |
| C              | 1      | 1     | 1          | 0           | yes                  |
| C              | 1      | 1     | 0          | 0           | no                   |
| C              | 1      | 1     | 0          | 1           | no                   |
| B              | 1      | 1     | 1          | 1           | no                   |

|   |   |   |   |   |     |
|---|---|---|---|---|-----|
| B | 0 | 0 | 1 | 0 | no  |
| B | 1 | 1 | 1 | 1 | no  |
| B | 1 | 0 | 1 | 1 | no  |
| B | 1 | 1 | 0 | 0 | no  |
| A | 0 | 0 | 0 | 1 | no  |
| C | 1 | 1 | 1 | 1 | no  |
| D | 1 | 1 | 1 | 1 | yes |
| C | 0 | 0 | 0 | 1 | no  |
| D | 1 | 1 | 0 | 1 | no  |
| C | 0 | 0 | 1 | 0 | no  |
| B | 1 | 1 | 0 | 0 | no  |
| D | 1 | 1 | 1 | 1 | no  |
| C | 1 | 0 | 0 | 1 | yes |
| A | 1 | 0 | 1 | 0 | yes |
| D | 1 | 0 | 1 | 0 | no  |
| C | 0 | 1 | 0 | 1 | no  |
| C | 1 | 1 | 1 | 1 | no  |
| C | 1 | 1 | 1 | 1 | no  |
| B | 0 | 0 | 1 | 0 | no  |
| B | 1 | 1 | 1 | 1 | no  |
| D | 1 | 1 | 1 | 1 | no  |
| C | 1 | 0 | 0 | 1 | no  |
| D | 0 | 0 | 0 | 1 | yes |
| C | 1 | 1 | 1 | 1 | no  |
| D | 1 | 1 | 1 | 1 | no  |
| C | 0 | 0 | 0 | 1 | yes |
| B | 1 | 1 | 1 | 1 | yes |
| B | 1 | 1 | 0 | 1 | no  |
| B | 0 | 0 | 1 | 0 | no  |
| B | 0 | 0 | 0 | 1 | no  |
| C | 1 | 1 | 1 | 1 | no  |
| B | 0 | 1 | 0 | 1 | no  |
| C | 1 | 0 | 1 | 1 | yes |
| B | 0 | 0 | 0 | 1 | no  |
| C | 1 | 0 | 0 | 1 | no  |
| D | 1 | 1 | 1 | 1 | no  |
| C | 0 | 0 | 0 | 1 | no  |
| B | 0 | 1 | 0 | 1 | yes |
| C | 0 | 0 | 0 | 1 | yes |
| D | 1 | 1 | 0 | 1 | no  |
| C | 0 | 0 | 0 | 1 | no  |
| B | 1 | 0 | 0 | 1 | no  |
| D | 1 | 0 | 1 | 1 | no  |
| B | 0 | 0 | 0 | 1 | no  |
| C | 1 | 1 | 0 | 1 | yes |
| D | 0 | 0 | 0 | 1 | no  |
| C | 0 | 0 | 1 | 1 | no  |

|   |   |   |   |   |     |
|---|---|---|---|---|-----|
| A | 1 | 1 | 0 | 1 | yes |
| C | 0 | 0 | 0 | 1 | no  |
| A | 1 | 0 | 1 | 1 | yes |
| C | 1 | 1 | 0 | 1 | no  |
| A | 1 | 1 | 0 | 1 | yes |
| B | 1 | 0 | 0 | 1 | no  |
| A | 0 | 0 | 1 | 1 | no  |
| A | 0 | 0 | 0 | 1 | yes |
| A | 1 | 1 | 1 | 1 | yes |
| B | 1 | 0 | 0 | 0 | no  |
| A | 1 | 0 | 0 | 0 | no  |
| A | 0 | 1 | 0 | 0 | no  |
| B | 1 | 0 | 0 | 0 | yes |
| A | 0 | 1 | 0 | 0 | no  |
| B | 1 | 0 | 0 | 0 | no  |
| B | 0 | 1 | 0 | 0 | no  |
| B | 0 | 1 | 0 | 0 | yes |
| D | 1 | 0 | 0 | 0 | no  |
| C | 0 | 1 | 0 | 0 | no  |
| C | 0 | 1 | 0 | 0 | yes |
| B | 1 | 0 | 0 | 0 | no  |
| B | 0 | 1 | 0 | 0 | no  |
| B | 1 | 0 | 0 | 0 | no  |
| B | 1 | 0 | 0 | 0 | no  |
| A | 1 | 0 | 0 | 0 | no  |
| A | 0 | 1 | 1 | 0 | no  |
| A | 1 | 0 | 1 | 0 | no  |
| C | 1 | 0 | 0 | 0 | yes |
| D | 0 | 1 | 1 | 1 | yes |
| C | 1 | 1 | 1 | 1 | no  |
| A | 1 | 1 | 1 | 0 | no  |
| A | 1 | 1 | 0 | 0 | no  |
| B | 0 | 1 | 1 | 1 | no  |
| D | 1 | 1 | 1 | 1 | no  |
| A | 1 | 0 | 0 | 0 | no  |
| B | 1 | 1 | 1 | 1 | no  |
| D | 1 | 1 | 1 | 1 | no  |
| B | 0 | 1 | 1 | 0 | no  |
| D | 0 | 0 | 0 | 1 | no  |
| C | 1 | 1 | 1 | 1 | no  |
| A | 1 | 1 | 1 | 1 | no  |
| B | 1 | 1 | 1 | 0 | no  |
| B | 1 | 0 | 0 | 0 | yes |
| C | 0 | 1 | 1 | 1 | no  |
| D | 0 | 1 | 1 | 0 | no  |
| D | 0 | 0 | 1 | 0 | no  |

|   |   |   |   |   |     |
|---|---|---|---|---|-----|
| C | 1 | 0 | 0 | 1 | no  |
| C | 0 | 1 | 1 | 1 | no  |
| B | 1 | 1 | 1 | 1 | yes |
| B | 1 | 1 | 1 | 0 | no  |
| B | 1 | 1 | 0 | 0 | no  |
| B | 1 | 1 | 0 | 1 | no  |
| B | 1 | 1 | 1 | 1 | no  |
| B | 0 | 0 | 1 | 0 | no  |
| A | 1 | 1 | 1 | 1 | no  |
| C | 1 | 0 | 1 | 1 | no  |
| C | 1 | 1 | 0 | 0 | no  |
| D | 0 | 0 | 0 | 1 | no  |
| B | 1 | 1 | 1 | 1 | yes |
| B | 1 | 1 | 1 | 1 | no  |
| B | 0 | 0 | 0 | 1 | no  |
| D | 1 | 1 | 0 | 1 | no  |
| C | 0 | 0 | 1 | 0 | no  |
| A | 1 | 1 | 0 | 0 | no  |
| C | 1 | 1 | 1 | 1 | yes |
| D | 1 | 0 | 0 | 1 | yes |
| B | 1 | 0 | 1 | 0 | no  |
| B | 1 | 0 | 1 | 0 | no  |
| D | 0 | 1 | 0 | 1 | no  |
| C | 1 | 1 | 1 | 1 | no  |
| A | 1 | 1 | 1 | 1 | no  |
| B | 0 | 0 | 1 | 0 | no  |
| B | 1 | 1 | 1 | 1 | no  |
| D | 1 | 1 | 1 | 1 | no  |
| C | 1 | 0 | 0 | 1 | yes |
| C | 0 | 0 | 0 | 1 | no  |
| D | 1 | 1 | 1 | 1 | no  |
| C | 1 | 1 | 1 | 1 | yes |
| C | 0 | 0 | 0 | 1 | yes |
| D | 1 | 1 | 1 | 1 | no  |
| D | 1 | 1 | 0 | 1 | no  |
| C | 0 | 0 | 1 | 0 | no  |
| C | 0 | 0 | 0 | 1 | no  |
| C | 1 | 1 | 1 | 1 | no  |
| B | 0 | 1 | 0 | 1 | yes |
| B | 1 | 0 | 1 | 1 | no  |
| B | 0 | 0 | 0 | 1 | no  |
| B | 1 | 0 | 0 | 1 | no  |
| B | 1 | 1 | 1 | 1 | no  |
| A | 0 | 0 | 0 | 1 | yes |
| C | 0 | 1 | 0 | 1 | yes |
| D | 0 | 0 | 0 | 1 | no  |
| C | 1 | 1 | 0 | 1 | no  |

|   |   |   |   |   |     |
|---|---|---|---|---|-----|
| D | 0 | 0 | 0 | 1 | no  |
| C | 1 | 0 | 0 | 1 | no  |
| B | 1 | 0 | 1 | 1 | no  |
| D | 0 | 0 | 0 | 1 | yes |
| C | 1 | 1 | 0 | 1 | no  |
| A | 0 | 0 | 0 | 1 | no  |
| D | 0 | 0 | 1 | 1 | yes |
| C | 1 | 1 | 0 | 1 | no  |
| C | 0 | 0 | 0 | 1 | yes |
| C | 1 | 0 | 1 | 1 | no  |
| B | 1 | 1 | 0 | 1 | yes |
| B | 1 | 1 | 0 | 1 | no  |
| D | 1 | 0 | 0 | 1 | no  |
| C | 0 | 0 | 1 | 1 | yes |
| D | 0 | 0 | 0 | 1 | yes |
| C | 1 | 1 | 1 | 1 | no  |
| D | 1 | 0 | 0 | 0 | no  |
| C | 1 | 0 | 0 | 0 | no  |
| B | 0 | 1 | 0 | 0 | no  |
| B | 0 | 1 | 0 | 0 | yes |
| B | 1 | 0 | 0 | 0 | no  |
| B | 0 | 1 | 0 | 0 | no  |
| C | 1 | 0 | 0 | 0 | no  |
| B | 0 | 1 | 0 | 0 | yes |
| C | 0 | 1 | 0 | 0 | no  |
| B | 1 | 0 | 0 | 0 | no  |
| C | 0 | 1 | 0 | 0 | yes |
| D | 0 | 1 | 0 | 0 | no  |
| C | 1 | 0 | 0 | 0 | no  |
| B | 0 | 1 | 0 | 0 | no  |
| C | 1 | 0 | 0 | 0 | no  |
| D | 1 | 0 | 0 | 0 | no  |
| C | 1 | 0 | 0 | 0 | no  |
| B | 0 | 1 | 1 | 0 | no  |
| D | 1 | 0 | 1 | 0 | yes |
| B | 1 | 0 | 0 | 0 | yes |
| C | 0 | 1 | 1 | 1 | no  |
| D | 1 | 1 | 1 | 1 | no  |
| C | 1 | 1 | 1 | 0 | no  |
| A | 1 | 1 | 0 | 0 | no  |
| C | 0 | 1 | 1 | 1 | no  |
| A | 1 | 1 | 1 | 1 | no  |
| C | 1 | 0 | 0 | 0 | no  |
| A | 1 | 1 | 1 | 1 | no  |
| B | 1 | 1 | 1 | 1 | no  |
| A | 0 | 1 | 1 | 0 | no  |
| A | 0 | 0 | 0 | 1 | no  |

|   |   |   |   |   |     |
|---|---|---|---|---|-----|
| A | 1 | 1 | 1 | 1 | no  |
| B | 1 | 1 | 1 | 1 | no  |
| A | 1 | 1 | 1 | 0 | yes |
| A | 1 | 0 | 0 | 0 | no  |
| A | 0 | 1 | 1 | 1 | no  |
| B | 0 | 1 | 1 | 0 | no  |
| A | 0 | 0 | 1 | 0 | no  |
| B | 1 | 0 | 0 | 1 | no  |
| B | 0 | 1 | 1 | 1 | yes |
| B | 1 | 1 | 1 | 1 | no  |
| D | 1 | 1 | 1 | 0 | no  |
| C | 1 | 1 | 0 | 0 | no  |
| C | 1 | 1 | 0 | 1 | no  |
| B | 1 | 1 | 1 | 1 | no  |
| B | 0 | 0 | 1 | 0 | no  |
| B | 1 | 1 | 1 | 1 | no  |
| B | 1 | 0 | 1 | 1 | no  |
| A | 1 | 1 | 0 | 0 | no  |
| A | 0 | 0 | 0 | 1 | yes |
| A | 1 | 1 | 1 | 1 | no  |
| C | 1 | 1 | 1 | 1 | no  |
| D | 0 | 0 | 0 | 1 | no  |
| C | 1 | 1 | 0 | 1 | no  |
| A | 0 | 0 | 1 | 0 | no  |
| A | 1 | 1 | 0 | 0 | yes |
| B | 1 | 1 | 1 | 1 | yes |
| D | 1 | 0 | 0 | 1 | no  |
| A | 1 | 0 | 1 | 0 | no  |
| B | 1 | 0 | 1 | 0 | no  |
| D | 0 | 1 | 0 | 1 | no  |
| B | 1 | 1 | 1 | 1 | no  |
| D | 1 | 1 | 1 | 1 | no  |
| C | 0 | 0 | 1 | 0 | no  |
| A | 1 | 1 | 1 | 1 | no  |
| B | 1 | 1 | 1 | 1 | yes |
| B | 1 | 0 | 0 | 1 | no  |
| C | 0 | 0 | 0 | 1 | no  |
| D | 1 | 1 | 1 | 1 | yes |
| D | 1 | 1 | 1 | 1 | yes |
| C | 0 | 0 | 0 | 1 | no  |
| C | 1 | 1 | 1 | 1 | no  |
| B | 1 | 1 | 0 | 1 | no  |
| B | 0 | 0 | 1 | 0 | no  |
| B | 0 | 0 | 0 | 1 | no  |
| B | 1 | 1 | 1 | 1 | yes |
| B | 0 | 1 | 0 | 1 | no  |
| B | 1 | 0 | 1 | 1 | no  |

|   |   |   |   |   |     |
|---|---|---|---|---|-----|
| A | 0 | 0 | 0 | 1 | no  |
| C | 1 | 0 | 0 | 1 | no  |
| C | 1 | 1 | 1 | 1 | yes |
| D | 0 | 0 | 0 | 1 | yes |
| B | 0 | 1 | 0 | 1 | no  |
| B | 0 | 0 | 0 | 1 | no  |
| B | 1 | 1 | 0 | 1 | no  |
| D | 0 | 0 | 0 | 1 | no  |
| C | 1 | 0 | 0 | 1 | no  |
| A | 1 | 0 | 1 | 1 | yes |
| C | 0 | 0 | 0 | 1 | no  |
| D | 1 | 1 | 0 | 1 | no  |
| B | 0 | 0 | 0 | 1 | yes |
| B | 0 | 0 | 1 | 1 | no  |
| D | 1 | 1 | 0 | 1 | yes |
| C | 0 | 0 | 0 | 1 | no  |
| A | 1 | 0 | 1 | 1 | yes |
| B | 1 | 1 | 0 | 1 | no  |
| B | 1 | 1 | 0 | 1 | no  |
| D | 1 | 0 | 0 | 1 | yes |
| C | 0 | 0 | 1 | 1 | yes |
| C | 0 | 0 | 0 | 1 | no  |
| D | 1 | 1 | 1 | 1 | no  |
| C | 1 | 0 | 0 | 0 | no  |
| C | 1 | 0 | 0 | 0 | no  |
| D | 0 | 1 | 0 | 0 | yes |
| D | 0 | 1 | 0 | 0 | no  |
| C | 1 | 0 | 0 | 0 | no  |
| C | 0 | 1 | 0 | 0 | no  |
| C | 1 | 0 | 0 | 0 | yes |
| B | 0 | 1 | 0 | 0 | no  |
| B | 0 | 1 | 0 | 0 | no  |
| B | 1 | 0 | 0 | 0 | yes |
| B | 0 | 1 | 0 | 0 | no  |
| B | 0 | 1 | 0 | 0 | no  |
| A | 1 | 0 | 0 | 0 | no  |
| C | 0 | 1 | 0 | 0 | no  |
| D | 1 | 0 | 0 | 0 | no  |
| C | 1 | 0 | 0 | 0 | no  |
| D | 1 | 0 | 0 | 0 | no  |
| C | 0 | 1 | 1 | 0 | yes |
| B | 1 | 0 | 1 | 0 | yes |
| D | 1 | 0 | 0 | 0 | no  |
| C | 0 | 1 | 1 | 1 | no  |
| A | 1 | 1 | 1 | 1 | no  |
| D | 1 | 1 | 1 | 0 | no  |
| C | 1 | 1 | 0 | 0 | no  |

|   |   |   |   |   |     |
|---|---|---|---|---|-----|
| C | 0 | 1 | 1 | 1 | no  |
| C | 1 | 1 | 1 | 1 | no  |
| B | 1 | 0 | 0 | 0 | no  |
| B | 1 | 1 | 1 | 1 | no  |
| D | 1 | 1 | 1 | 1 | no  |
| C | 0 | 1 | 1 | 0 | no  |
| D | 0 | 0 | 0 | 1 | no  |
| C | 1 | 1 | 1 | 1 | no  |
| D | 1 | 1 | 1 | 1 | yes |
| C | 1 | 1 | 1 | 0 | no  |
| B | 1 | 0 | 0 | 0 | no  |
| B | 0 | 1 | 1 | 1 | no  |
| B | 0 | 1 | 1 | 0 | no  |
| B | 0 | 0 | 1 | 0 | no  |
| C | 1 | 0 | 0 | 1 | yes |
| B | 0 | 1 | 1 | 1 | no  |
| C | 1 | 1 | 1 | 1 | no  |
| B | 1 | 1 | 1 | 0 | no  |
| C | 1 | 1 | 0 | 0 | no  |
| D | 1 | 1 | 0 | 1 | no  |
| C | 1 | 1 | 1 | 1 | no  |
| B | 0 | 0 | 1 | 0 | no  |
| C | 1 | 1 | 1 | 1 | no  |
| D | 1 | 0 | 1 | 1 | no  |
| C | 1 | 1 | 0 | 0 | yes |
| B | 0 | 0 | 0 | 1 | no  |
| D | 1 | 1 | 1 | 1 | no  |
| B | 1 | 1 | 1 | 1 | no  |
| C | 0 | 0 | 0 | 1 | no  |
| D | 1 | 1 | 0 | 1 | no  |
| C | 0 | 0 | 1 | 0 | yes |
| A | 1 | 1 | 0 | 0 | yes |
| C | 1 | 1 | 1 | 1 | no  |
| A | 1 | 0 | 0 | 1 | no  |
| C | 1 | 0 | 1 | 0 | no  |
| A | 1 | 0 | 1 | 0 | no  |
| B | 0 | 1 | 0 | 1 | no  |
| A | 1 | 1 | 1 | 1 | no  |
| A | 1 | 1 | 1 | 1 | no  |
| A | 0 | 0 | 1 | 0 | no  |
| B | 1 | 1 | 1 | 1 | yes |
| A | 1 | 1 | 1 | 1 | no  |
| A | 1 | 0 | 0 | 1 | no  |
| A | 0 | 0 | 0 | 1 | yes |
| B | 1 | 1 | 1 | 1 | yes |
| A | 1 | 1 | 1 | 1 | no  |
| B | 0 | 0 | 0 | 1 | no  |



|   |   |   |   |   |     |
|---|---|---|---|---|-----|
| B | 1 | 1 | 1 | 1 | no  |
| B | 1 | 1 | 0 | 1 | no  |
| D | 0 | 0 | 1 | 0 | no  |
| C | 0 | 0 | 0 | 1 | yes |
| C | 1 | 1 | 1 | 1 | no  |
| B | 0 | 1 | 0 | 1 | no  |
| B | 1 | 0 | 1 | 1 | no  |
| B | 0 | 0 | 0 | 1 | no  |
| B | 1 | 0 | 0 | 1 | yes |
| A | 1 | 1 | 1 | 1 | yes |
| A | 0 | 0 | 0 | 1 | no  |
| A | 0 | 1 | 0 | 1 | no  |
| C | 0 | 0 | 0 | 1 | no  |
| D | 1 | 1 | 0 | 1 | no  |
| C | 0 | 0 | 0 | 1 | no  |
| A | 1 | 0 | 0 | 1 | yes |
| A | 1 | 0 | 1 | 1 | no  |
| B | 0 | 0 | 0 | 1 | no  |
| D | 1 | 1 | 0 | 1 | yes |
| A | 0 | 0 | 0 | 1 | no  |
| B | 0 | 0 | 1 | 1 | yes |
| D | 1 | 1 | 0 | 1 | no  |
| B | 0 | 0 | 0 | 1 | yes |
| D | 1 | 0 | 1 | 1 | no  |
| C | 1 | 1 | 0 | 1 | no  |
| A | 1 | 1 | 0 | 1 | yes |
| B | 1 | 0 | 0 | 1 | yes |
| B | 0 | 0 | 1 | 1 | no  |
| C | 0 | 0 | 0 | 1 | no  |
| D | 1 | 1 | 1 | 1 | no  |
| D | 1 | 0 | 0 | 0 | no  |
| C | 1 | 0 | 0 | 0 | yes |
| C | 0 | 1 | 0 | 0 | no  |
| B | 0 | 1 | 0 | 0 | no  |
| B | 1 | 0 | 0 | 0 | no  |
| B | 0 | 1 | 0 | 0 | yes |
| B | 1 | 0 | 0 | 0 | no  |
| B | 0 | 1 | 0 | 0 | no  |
| B | 0 | 1 | 0 | 0 | yes |
| A | 1 | 0 | 0 | 0 | no  |
| C | 0 | 1 | 0 | 0 | no  |
| C | 0 | 1 | 0 | 0 | no  |
| D | 1 | 0 | 0 | 0 | no  |
| B | 0 | 1 | 0 | 0 | no  |
| B | 1 | 0 | 0 | 0 | no  |
| B | 1 | 0 | 0 | 0 | no  |
| D | 1 | 0 | 0 | 0 | yes |

|   |   |   |   |   |     |
|---|---|---|---|---|-----|
| C | 0 | 1 | 1 | 0 | yes |
| A | 1 | 0 | 1 | 0 | no  |
| C | 1 | 0 | 0 | 0 | no  |
| D | 0 | 1 | 1 | 1 | no  |
| B | 1 | 1 | 1 | 1 | no  |
| B | 1 | 1 | 1 | 0 | no  |
| D | 1 | 1 | 0 | 0 | no  |
| C | 0 | 1 | 1 | 1 | no  |
| A | 1 | 1 | 1 | 1 | no  |
| B | 1 | 0 | 0 | 0 | no  |
| B | 1 | 1 | 1 | 1 | no  |
| D | 1 | 1 | 1 | 1 | no  |
| C | 0 | 1 | 1 | 0 | no  |
| C | 0 | 0 | 0 | 1 | no  |
| D | 1 | 1 | 1 | 1 | yes |
| C | 1 | 1 | 1 | 1 | no  |
| C | 1 | 1 | 1 | 0 | no  |
| D | 1 | 0 | 0 | 0 | no  |
| D | 0 | 1 | 1 | 1 | no  |
| C | 0 | 1 | 1 | 0 | no  |
| C | 0 | 0 | 1 | 0 | yes |
| C | 1 | 0 | 0 | 1 | no  |
| B | 0 | 1 | 1 | 1 | no  |
| B | 1 | 1 | 1 | 1 | no  |
| B | 1 | 1 | 1 | 0 | no  |
| B | 1 | 1 | 0 | 0 | no  |
| B | 1 | 1 | 0 | 1 | no  |
| A | 1 | 1 | 1 | 1 | no  |
| C | 0 | 0 | 1 | 0 | no  |
| D | 1 | 1 | 1 | 1 | no  |
| C | 1 | 0 | 1 | 1 | yes |
| D | 1 | 1 | 0 | 0 | no  |
| C | 0 | 0 | 0 | 1 | no  |
| B | 1 | 1 | 1 | 1 | no  |
| D | 1 | 1 | 1 | 1 | no  |
| C | 0 | 0 | 0 | 1 | no  |
| A | 1 | 1 | 0 | 1 | yes |
| D | 0 | 0 | 1 | 0 | yes |
| C | 1 | 1 | 0 | 0 | no  |
| C | 1 | 1 | 1 | 1 | no  |
| C | 1 | 0 | 0 | 1 | no  |
| B | 1 | 0 | 1 | 0 | no  |
| B | 1 | 0 | 1 | 0 | no  |
| D | 0 | 1 | 0 | 1 | no  |
| C | 1 | 1 | 1 | 1 | no  |
| D | 1 | 1 | 1 | 1 | no  |
| C | 0 | 0 | 1 | 0 | yes |

|   |   |   |   |   |     |
|---|---|---|---|---|-----|
| D | 1 | 1 | 1 | 1 | no  |
| C | 1 | 1 | 1 | 1 | no  |
| B | 1 | 0 | 0 | 1 | yes |
| B | 0 | 0 | 0 | 1 | yes |
| B | 1 | 1 | 1 | 1 | no  |
| B | 1 | 1 | 1 | 1 | no  |
| C | 0 | 0 | 0 | 1 | no  |
| B | 1 | 1 | 1 | 1 | no  |
| C | 1 | 1 | 0 | 1 | no  |
| B | 0 | 0 | 1 | 0 | yes |
| C | 0 | 0 | 0 | 1 | no  |
| D | 1 | 1 | 1 | 1 | no  |
| C | 0 | 1 | 0 | 1 | no  |
| B | 1 | 0 | 1 | 1 | no  |
| C | 0 | 0 | 0 | 1 | yes |
| D | 1 | 0 | 0 | 1 | yes |
| C | 1 | 1 | 1 | 1 | no  |
| B | 0 | 0 | 0 | 1 | no  |
| D | 0 | 1 | 0 | 1 | no  |
| B | 0 | 0 | 0 | 1 | no  |
| C | 1 | 1 | 0 | 1 | no  |
| D | 0 | 0 | 0 | 1 | yes |
| C | 1 | 0 | 0 | 1 | no  |
| A | 1 | 0 | 1 | 1 | no  |
| C | 0 | 0 | 0 | 1 | yes |
| A | 1 | 1 | 0 | 1 | no  |
| C | 0 | 0 | 0 | 1 | yes |
| A | 0 | 0 | 1 | 1 | no  |
| B | 1 | 1 | 0 | 1 | yes |
| A | 0 | 0 | 0 | 1 | no  |
| A | 1 | 0 | 1 | 1 | no  |
| A | 1 | 1 | 0 | 1 | yes |
| B | 1 | 1 | 0 | 1 | yes |
| A | 1 | 0 | 0 | 1 | no  |
| A | 0 | 0 | 1 | 1 | no  |
| A | 0 | 0 | 0 | 1 | no  |
| B | 1 | 1 | 1 | 1 | no  |
| A | 1 | 0 | 0 | 0 | yes |
| B | 1 | 0 | 0 | 0 | no  |
| B | 0 | 1 | 0 | 0 | no  |
| B | 0 | 1 | 0 | 0 | no  |
| D | 1 | 0 | 0 | 0 | yes |
| C | 0 | 1 | 0 | 0 | no  |
| C | 1 | 0 | 0 | 0 | no  |
| B | 0 | 1 | 0 | 0 | yes |
| B | 0 | 1 | 0 | 0 | no  |
| B | 1 | 0 | 0 | 0 | no  |

|   |   |   |   |   |     |
|---|---|---|---|---|-----|
| B | 0 | 1 | 0 | 0 | no  |
| A | 0 | 1 | 0 | 0 | no  |
| A | 1 | 0 | 0 | 0 | no  |
| A | 0 | 1 | 0 | 0 | no  |
| C | 1 | 0 | 0 | 0 | no  |
| D | 1 | 0 | 0 | 0 | yes |
| C | 1 | 0 | 0 | 0 | yes |
| A | 0 | 1 | 1 | 0 | no  |
| A | 1 | 0 | 1 | 0 | no  |
| B | 1 | 0 | 0 | 0 | no  |
| D | 0 | 1 | 1 | 1 | no  |
| A | 1 | 1 | 1 | 1 | no  |
| B | 1 | 1 | 1 | 0 | no  |
| D | 1 | 1 | 0 | 0 | no  |
| B | 0 | 1 | 1 | 1 | no  |
| D | 1 | 1 | 1 | 1 | no  |
| C | 1 | 0 | 0 | 0 | no  |
| A | 1 | 1 | 1 | 1 | no  |
| B | 1 | 1 | 1 | 1 | no  |
| B | 0 | 1 | 1 | 0 | no  |
| C | 0 | 0 | 0 | 1 | yes |
| D | 1 | 1 | 1 | 1 | no  |
| D | 1 | 1 | 1 | 1 | no  |
| C | 1 | 1 | 1 | 0 | no  |
| C | 1 | 0 | 0 | 0 | no  |
| B | 0 | 1 | 1 | 1 | no  |
| B | 0 | 1 | 1 | 0 | yes |
| B | 0 | 0 | 1 | 0 | no  |
| B | 1 | 0 | 0 | 1 | no  |
| B | 0 | 1 | 1 | 1 | no  |
| B | 1 | 1 | 1 | 1 | no  |
| A | 1 | 1 | 1 | 0 | no  |
| C | 1 | 1 | 0 | 0 | no  |
| C | 1 | 1 | 0 | 1 | no  |
| D | 1 | 1 | 1 | 1 | no  |
| B | 0 | 0 | 1 | 0 | no  |
| B | 1 | 1 | 1 | 1 | yes |
| B | 1 | 0 | 1 | 1 | no  |
| D | 1 | 1 | 0 | 0 | no  |
| C | 0 | 0 | 0 | 1 | no  |
| A | 1 | 1 | 1 | 1 | no  |
| C | 1 | 1 | 1 | 1 | no  |
| D | 0 | 0 | 0 | 1 | yes |
| B | 1 | 1 | 0 | 1 | yes |
| B | 0 | 0 | 1 | 0 | no  |
| D | 1 | 1 | 0 | 0 | no  |
| C | 1 | 1 | 1 | 1 | no  |

|   |   |   |   |   |     |
|---|---|---|---|---|-----|
| A | 1 | 0 | 0 | 1 | no  |
| B | 1 | 0 | 1 | 0 | no  |
| B | 1 | 0 | 1 | 0 | no  |
| D | 0 | 1 | 0 | 1 | no  |
| C | 1 | 1 | 1 | 1 | no  |
| C | 1 | 1 | 1 | 1 | yes |
| D | 0 | 0 | 1 | 0 | no  |
| C | 1 | 1 | 1 | 1 | no  |
| C | 1 | 1 | 1 | 1 | yes |
| D | 1 | 0 | 0 | 1 | yes |
| D | 0 | 0 | 0 | 1 | no  |
| C | 1 | 1 | 1 | 1 | no  |
| C | 1 | 1 | 1 | 1 | no  |
| C | 0 | 0 | 0 | 1 | no  |
| B | 1 | 1 | 1 | 1 | no  |
| B | 1 | 1 | 0 | 1 | yes |
| B | 0 | 0 | 1 | 0 | no  |
| B | 0 | 0 | 0 | 1 | no  |
| B | 1 | 1 | 1 | 1 | no  |
| A | 0 | 1 | 0 | 1 | no  |
| C | 1 | 0 | 1 | 1 | yes |
| D | 0 | 0 | 0 | 1 | yes |
| C | 1 | 0 | 0 | 1 | no  |
| D | 1 | 1 | 1 | 1 | no  |
| C | 0 | 0 | 0 | 1 | no  |
| B | 0 | 1 | 0 | 1 | no  |
| D | 0 | 0 | 0 | 1 | no  |
| C | 1 | 1 | 0 | 1 | yes |
| A | 0 | 0 | 0 | 1 | no  |
| D | 1 | 0 | 0 | 1 | no  |
| C | 1 | 0 | 1 | 1 | yes |
| C | 0 | 0 | 0 | 1 | no  |
| C | 1 | 1 | 0 | 1 | yes |
| B | 0 | 0 | 0 | 1 | no  |
| B | 0 | 0 | 1 | 1 | yes |
| D | 1 | 1 | 0 | 1 | no  |
| C | 0 | 0 | 0 | 1 | no  |
| D | 1 | 0 | 1 | 1 | yes |
| C | 1 | 1 | 0 | 1 | yes |
| D | 1 | 1 | 0 | 1 | no  |
| C | 1 | 0 | 0 | 1 | no  |
| B | 0 | 0 | 1 | 1 | no  |
| B | 0 | 0 | 0 | 1 | no  |
| B | 1 | 1 | 1 | 1 | yes |
| B | 1 | 0 | 0 | 0 | no  |
| C | 1 | 0 | 0 | 0 | no  |
| B | 0 | 1 | 0 | 0 | no  |

|   |   |   |   |   |     |
|---|---|---|---|---|-----|
| C | 0 | 1 | 0 | 0 | yes |
| B | 1 | 0 | 0 | 0 | no  |
| C | 0 | 1 | 0 | 0 | no  |
| D | 1 | 0 | 0 | 0 | yes |
| C | 0 | 1 | 0 | 0 | no  |
| B | 0 | 1 | 0 | 0 | no  |
| C | 1 | 0 | 0 | 0 | no  |
| D | 0 | 1 | 0 | 0 | no  |
| C | 0 | 1 | 0 | 0 | no  |
| B | 1 | 0 | 0 | 0 | no  |
| D | 0 | 1 | 0 | 0 | no  |
| B | 1 | 0 | 0 | 0 | yes |
| C | 1 | 0 | 0 | 0 | yes |
| D | 1 | 0 | 0 | 0 | no  |
| C | 0 | 1 | 1 | 0 | no  |
| A | 1 | 0 | 1 | 0 | no  |
| C | 1 | 0 | 0 | 0 | no  |
| A | 0 | 1 | 1 | 1 | no  |
| C | 1 | 1 | 1 | 1 | no  |
| A | 1 | 1 | 1 | 0 | no  |
| B | 1 | 1 | 0 | 0 | no  |
| A | 0 | 1 | 1 | 1 | no  |
| A | 1 | 1 | 1 | 1 | no  |
| A | 1 | 0 | 0 | 0 | no  |
| B | 1 | 1 | 1 | 1 | no  |
| A | 1 | 1 | 1 | 1 | no  |
| A | 0 | 1 | 1 | 0 | yes |
| A | 0 | 0 | 0 | 1 | no  |
| B | 1 | 1 | 1 | 1 | no  |
| A | 1 | 1 | 1 | 1 | no  |
| B | 1 | 1 | 1 | 0 | no  |
| B | 1 | 0 | 0 | 0 | no  |
| B | 0 | 1 | 1 | 1 | yes |
| D | 0 | 1 | 1 | 0 | no  |
| C | 0 | 0 | 1 | 0 | no  |
| C | 1 | 0 | 0 | 1 | no  |
| B | 0 | 1 | 1 | 1 | no  |
| B | 1 | 1 | 1 | 1 | no  |
| B | 1 | 1 | 1 | 0 | no  |
| B | 1 | 1 | 0 | 0 | no  |
| A | 1 | 1 | 0 | 1 | no  |
| A | 1 | 1 | 1 | 1 | no  |
| A | 0 | 0 | 1 | 0 | yes |
| C | 1 | 1 | 1 | 1 | no  |
| D | 1 | 0 | 1 | 1 | no  |
| C | 1 | 1 | 0 | 0 | no  |
| A | 0 | 0 | 0 | 1 | no  |

|   |   |   |   |   |     |
|---|---|---|---|---|-----|
| A | 1 | 1 | 1 | 1 | no  |
| B | 1 | 1 | 1 | 1 | yes |
| D | 0 | 0 | 0 | 1 | yes |
| A | 1 | 1 | 0 | 1 | no  |
| B | 0 | 0 | 1 | 0 | no  |
| D | 1 | 1 | 0 | 0 | no  |
| B | 1 | 1 | 1 | 1 | no  |
| D | 1 | 0 | 0 | 1 | no  |
| C | 1 | 0 | 1 | 0 | no  |
| A | 1 | 0 | 1 | 0 | no  |
| B | 0 | 1 | 0 | 1 | no  |
| B | 1 | 1 | 1 | 1 | yes |
| C | 1 | 1 | 1 | 1 | no  |
| D | 0 | 0 | 1 | 0 | no  |
| D | 1 | 1 | 1 | 1 | yes |
| C | 1 | 1 | 1 | 1 | yes |
| C | 1 | 0 | 0 | 1 | no  |
| B | 0 | 0 | 0 | 1 | no  |
| B | 1 | 1 | 1 | 1 | no  |
| B | 1 | 1 | 1 | 1 | no  |
| B | 0 | 0 | 0 | 1 | no  |
| B | 1 | 1 | 1 | 1 | yes |
| B | 1 | 1 | 0 | 1 | no  |
| A | 0 | 0 | 1 | 0 | no  |
| C | 0 | 0 | 0 | 1 | no  |
| C | 1 | 1 | 1 | 1 | no  |
| D | 0 | 1 | 0 | 1 | yes |
| B | 1 | 0 | 1 | 1 | yes |
| B | 0 | 0 | 0 | 1 | no  |
| B | 1 | 0 | 0 | 1 | no  |
| D | 1 | 1 | 1 | 1 | no  |
| C | 0 | 0 | 0 | 1 | no  |
| A | 0 | 1 | 0 | 1 | no  |
| C | 0 | 0 | 0 | 1 | yes |
| D | 1 | 1 | 0 | 1 | no  |
| B | 0 | 0 | 0 | 1 | no  |
| B | 1 | 0 | 0 | 1 | yes |
| D | 1 | 0 | 1 | 1 | no  |
| C | 0 | 0 | 0 | 1 | yes |
| A | 1 | 1 | 0 | 1 | no  |
| B | 0 | 0 | 0 | 1 | yes |
| B | 0 | 0 | 1 | 1 | no  |
| D | 1 | 1 | 0 | 1 | no  |
| C | 0 | 0 | 0 | 1 | yes |
| C | 1 | 0 | 1 | 1 | yes |
| D | 1 | 1 | 0 | 1 | no  |
| C | 1 | 1 | 0 | 1 | no  |

|   |   |   |   |   |     |
|---|---|---|---|---|-----|
| C | 1 | 0 | 0 | 1 | no  |
| D | 0 | 0 | 1 | 1 | no  |
| D | 0 | 0 | 0 | 1 | yes |
| C | 1 | 1 | 1 | 1 | no  |
| C | 1 | 0 | 0 | 0 | no  |
| C | 1 | 0 | 0 | 0 | no  |
| B | 0 | 1 | 0 | 0 | yes |
| B | 0 | 1 | 0 | 0 | no  |
| B | 1 | 0 | 0 | 0 | no  |
| B | 0 | 1 | 0 | 0 | yes |
| B | 1 | 0 | 0 | 0 | no  |
| A | 0 | 1 | 0 | 0 | no  |
| C | 0 | 1 | 0 | 0 | no  |
| D | 1 | 0 | 0 | 0 | no  |
| C | 0 | 1 | 0 | 0 | no  |
| D | 0 | 1 | 0 | 0 | no  |
| C | 1 | 0 | 0 | 0 | no  |
| B | 0 | 1 | 0 | 0 | yes |
| D | 1 | 0 | 0 | 0 | yes |
| C | 1 | 0 | 0 | 0 | no  |
| A | 1 | 0 | 0 | 0 | no  |
| D | 0 | 1 | 1 | 0 | no  |
| C | 1 | 0 | 1 | 0 | no  |
| C | 1 | 0 | 0 | 0 | no  |
| C | 0 | 1 | 1 | 1 | no  |
| B | 1 | 1 | 1 | 1 | no  |
| B | 1 | 1 | 1 | 0 | no  |
| D | 1 | 1 | 0 | 0 | no  |
| C | 0 | 1 | 1 | 1 | no  |
| D | 1 | 1 | 1 | 1 | no  |
| C | 1 | 0 | 0 | 0 | no  |
| D | 1 | 1 | 1 | 1 | no  |
| C | 1 | 1 | 1 | 1 | yes |
| B | 0 | 1 | 1 | 0 | no  |
| B | 0 | 0 | 0 | 1 | no  |
| B | 1 | 1 | 1 | 1 | no  |
| B | 1 | 1 | 1 | 1 | no  |
| C | 1 | 1 | 1 | 0 | no  |
| B | 1 | 0 | 0 | 0 | yes |
| C | 0 | 1 | 1 | 1 | no  |
| B | 0 | 1 | 1 | 0 | no  |
| C | 0 | 0 | 1 | 0 | no  |
| D | 1 | 0 | 0 | 1 | no  |
| C | 0 | 1 | 1 | 1 | no  |
| B | 1 | 1 | 1 | 1 | no  |
| C | 1 | 1 | 1 | 0 | no  |
| D | 1 | 1 | 0 | 0 | no  |



|   |   |   |   |   |     |
|---|---|---|---|---|-----|
| C | 1 | 1 | 0 | 1 | no  |
| B | 1 | 1 | 1 | 1 | yes |
| D | 0 | 0 | 1 | 0 | no  |
| B | 1 | 1 | 1 | 1 | no  |
| C | 1 | 0 | 1 | 1 | no  |
| D | 1 | 1 | 0 | 0 | no  |
| C | 0 | 0 | 0 | 1 | no  |
| A | 1 | 1 | 1 | 1 | yes |
| C | 1 | 1 | 1 | 1 | yes |
| A | 0 | 0 | 0 | 1 | no  |
| C | 1 | 1 | 0 | 1 | no  |
| A | 0 | 0 | 1 | 0 | no  |
| B | 1 | 1 | 0 | 0 | no  |
| A | 1 | 1 | 1 | 1 | no  |
| A | 1 | 0 | 0 | 1 | no  |
| A | 1 | 0 | 1 | 0 | no  |
| B | 1 | 0 | 1 | 0 | no  |
| A | 0 | 1 | 0 | 1 | yes |
| A | 1 | 1 | 1 | 1 | no  |
| A | 1 | 1 | 1 | 1 | no  |
| B | 0 | 0 | 1 | 0 | yes |
| A | 1 | 1 | 1 | 1 | yes |
| B | 1 | 1 | 1 | 1 | no  |
| B | 1 | 0 | 0 | 1 | no  |
| B | 0 | 0 | 0 | 1 | no  |
| D | 1 | 1 | 1 | 1 | no  |
| C | 1 | 1 | 1 | 1 | no  |
| C | 0 | 0 | 0 | 1 | yes |
| B | 1 | 1 | 1 | 1 | no  |
| B | 1 | 1 | 0 | 1 | no  |
| B | 0 | 0 | 1 | 0 | no  |
| B | 0 | 0 | 0 | 1 | no  |
| A | 1 | 1 | 1 | 1 | yes |
| A | 0 | 1 | 0 | 1 | yes |
| A | 1 | 0 | 1 | 1 | no  |
| C | 0 | 0 | 0 | 1 | no  |
| D | 1 | 0 | 0 | 1 | no  |
| C | 1 | 1 | 1 | 1 | no  |
| A | 0 | 0 | 0 | 1 | no  |
| A | 0 | 1 | 0 | 1 | yes |
| B | 0 | 0 | 0 | 1 | no  |
| D | 1 | 1 | 0 | 1 | no  |
| A | 0 | 0 | 0 | 1 | yes |
| B | 1 | 0 | 0 | 1 | no  |
| D | 1 | 0 | 1 | 1 | yes |
| B | 0 | 0 | 0 | 1 | no  |
| D | 1 | 1 | 0 | 1 | yes |

|   |   |   |   |   |     |
|---|---|---|---|---|-----|
| C | 0 | 0 | 0 | 1 | no  |
| A | 0 | 0 | 1 | 1 | no  |
| B | 1 | 1 | 0 | 1 | yes |
| B | 0 | 0 | 0 | 1 | yes |
| C | 1 | 0 | 1 | 1 | no  |
| D | 1 | 1 | 0 | 1 | no  |
| D | 1 | 1 | 0 | 1 | no  |
| C | 1 | 0 | 0 | 1 | no  |
| C | 0 | 0 | 1 | 1 | yes |
| B | 0 | 0 | 0 | 1 | no  |
| B | 1 | 1 | 1 | 1 | no  |
| B | 1 | 0 | 0 | 0 | no  |
| B | 1 | 0 | 0 | 0 | yes |
| B | 0 | 1 | 0 | 0 | no  |
| B | 0 | 1 | 0 | 0 | no  |
| A | 1 | 0 | 0 | 0 | yes |
| C | 0 | 1 | 0 | 0 | no  |
| C | 1 | 0 | 0 | 0 | no  |
| D | 0 | 1 | 0 | 0 | no  |
| B | 0 | 1 | 0 | 0 | no  |
| B | 1 | 0 | 0 | 0 | no  |
| B | 0 | 1 | 0 | 0 | no  |
| D | 0 | 1 | 0 | 0 | no  |
| C | 1 | 0 | 0 | 0 | yes |
| A | 0 | 1 | 0 | 0 | yes |
| C | 1 | 0 | 0 | 0 | no  |
| D | 1 | 0 | 0 | 0 | no  |
| B | 1 | 0 | 0 | 0 | no  |
| B | 0 | 1 | 1 | 0 | no  |
| D | 1 | 0 | 1 | 0 | no  |
| C | 1 | 0 | 0 | 0 | no  |
| A | 0 | 1 | 1 | 1 | no  |
| B | 1 | 1 | 1 | 1 | no  |
| B | 1 | 1 | 1 | 0 | no  |
| D | 1 | 1 | 0 | 0 | no  |
| C | 0 | 1 | 1 | 1 | no  |
| C | 1 | 1 | 1 | 1 | no  |
| D | 1 | 0 | 0 | 0 | no  |
| C | 1 | 1 | 1 | 1 | yes |
| C | 1 | 1 | 1 | 1 | no  |
| D | 0 | 1 | 1 | 0 | no  |
| D | 0 | 0 | 0 | 1 | no  |
| C | 1 | 1 | 1 | 1 | no  |
| C | 1 | 1 | 1 | 1 | no  |
| C | 1 | 1 | 1 | 0 | yes |
| B | 1 | 0 | 0 | 0 | no  |
| B | 0 | 1 | 1 | 1 | no  |

|   |   |   |   |   |     |
|---|---|---|---|---|-----|
| B | 0 | 1 | 1 | 0 | no  |
| B | 0 | 0 | 1 | 0 | no  |
| B | 1 | 0 | 0 | 1 | no  |
| A | 0 | 1 | 1 | 1 | no  |
| C | 1 | 1 | 1 | 1 | no  |
| D | 1 | 1 | 1 | 0 | no  |
| C | 1 | 1 | 0 | 0 | no  |
| D | 1 | 1 | 0 | 1 | yes |
| C | 1 | 1 | 1 | 1 | no  |
| B | 0 | 0 | 1 | 0 | no  |
| D | 1 | 1 | 1 | 1 | no  |
| C | 1 | 0 | 1 | 1 | no  |
| A | 1 | 1 | 0 | 0 | no  |
| D | 0 | 0 | 0 | 1 | yes |
| C | 1 | 1 | 1 | 1 | yes |
| C | 1 | 1 | 1 | 1 | no  |
| C | 0 | 0 | 0 | 1 | no  |
| B | 1 | 1 | 0 | 1 | no  |
| B | 0 | 0 | 1 | 0 | no  |
| D | 1 | 1 | 0 | 0 | no  |
| C | 1 | 1 | 1 | 1 | no  |
| D | 1 | 0 | 0 | 1 | no  |
| C | 1 | 0 | 1 | 0 | no  |
| D | 1 | 0 | 1 | 0 | yes |
| C | 0 | 1 | 0 | 1 | no  |
| B | 1 | 1 | 1 | 1 | no  |
| B | 1 | 1 | 1 | 1 | yes |
| B | 0 | 0 | 1 | 0 | yes |
| B | 1 | 1 | 1 | 1 | no  |
| C | 1 | 1 | 1 | 1 | no  |
| B | 1 | 0 | 0 | 1 | no  |
| C | 0 | 0 | 0 | 1 | no  |
| B | 1 | 1 | 1 | 1 | no  |
| C | 1 | 1 | 1 | 1 | yes |
| D | 0 | 0 | 0 | 1 | no  |
| C | 1 | 1 | 1 | 1 | no  |
| B | 1 | 1 | 0 | 1 | no  |
| C | 0 | 0 | 1 | 0 | no  |
| D | 0 | 0 | 0 | 1 | yes |
| C | 1 | 1 | 1 | 1 | yes |
| B | 0 | 1 | 0 | 1 | no  |
| D | 1 | 0 | 1 | 1 | no  |
| B | 0 | 0 | 0 | 1 | no  |
| C | 1 | 0 | 0 | 1 | no  |
| D | 1 | 1 | 1 | 1 | no  |
| C | 0 | 0 | 0 | 1 | yes |
| A | 0 | 1 | 0 | 1 | no  |

|   |   |   |   |   |     |
|---|---|---|---|---|-----|
| C | 0 | 0 | 0 | 1 | no  |
| A | 1 | 1 | 0 | 1 | yes |
| C | 0 | 0 | 0 | 1 | no  |
| A | 1 | 0 | 0 | 1 | yes |
| B | 1 | 0 | 1 | 1 | no  |
| A | 0 | 0 | 0 | 1 | yes |
| A | 1 | 1 | 0 | 1 | no  |
| A | 0 | 0 | 0 | 1 | no  |
| B | 0 | 0 | 1 | 1 | yes |
| A | 1 | 1 | 0 | 1 | yes |
| A | 0 | 0 | 0 | 1 | no  |
| A | 1 | 0 | 1 | 1 | no  |
| B | 1 | 1 | 0 | 1 | no  |
| A | 1 | 1 | 0 | 1 | no  |
| B | 1 | 0 | 0 | 1 | yes |
| B | 0 | 0 | 1 | 1 | no  |
| B | 0 | 0 | 0 | 1 | no  |
| D | 1 | 1 | 1 | 1 | no  |
| C | 1 | 0 | 0 | 0 | yes |
| C | 1 | 0 | 0 | 0 | no  |
| B | 0 | 1 | 0 | 0 | no  |
| B | 0 | 1 | 0 | 0 | yes |
| B | 1 | 0 | 0 | 0 | no  |
| B | 0 | 1 | 0 | 0 | no  |
| A | 1 | 0 | 0 | 0 | no  |
| A | 0 | 1 | 0 | 0 | no  |
| A | 0 | 1 | 0 | 0 | no  |
| C | 1 | 0 | 0 | 0 | no  |
| D | 0 | 1 | 0 | 0 | no  |
| C | 0 | 1 | 0 | 0 | yes |
| A | 1 | 0 | 0 | 0 | yes |
| A | 0 | 1 | 0 | 0 | no  |
| B | 1 | 0 | 0 | 0 | no  |
| D | 1 | 0 | 0 | 0 | no  |
| A | 1 | 0 | 0 | 0 | no  |
| B | 0 | 1 | 1 | 0 | no  |
| D | 1 | 0 | 1 | 0 | no  |
| B | 1 | 0 | 0 | 0 | no  |
| D | 0 | 1 | 1 | 1 | no  |
| C | 1 | 1 | 1 | 1 | no  |
| A | 1 | 1 | 1 | 0 | no  |
| B | 1 | 1 | 0 | 0 | no  |
| B | 0 | 1 | 1 | 1 | no  |
| C | 1 | 1 | 1 | 1 | no  |
| D | 1 | 0 | 0 | 0 | yes |
| D | 1 | 1 | 1 | 1 | no  |
| C | 1 | 1 | 1 | 1 | no  |

|   |   |   |   |   |     |
|---|---|---|---|---|-----|
| C | 0 | 1 | 1 | 0 | no  |
| B | 0 | 0 | 0 | 1 | no  |
| B | 1 | 1 | 1 | 1 | no  |
| B | 1 | 1 | 1 | 1 | yes |
| B | 1 | 1 | 1 | 0 | no  |
| B | 1 | 0 | 0 | 0 | no  |
| B | 0 | 1 | 1 | 1 | no  |
| A | 0 | 1 | 1 | 0 | no  |
| C | 0 | 0 | 1 | 0 | no  |
| C | 1 | 0 | 0 | 1 | no  |
| D | 0 | 1 | 1 | 1 | no  |
| B | 1 | 1 | 1 | 1 | no  |
| B | 1 | 1 | 1 | 0 | no  |
| B | 1 | 1 | 0 | 0 | yes |
| D | 1 | 1 | 0 | 1 | no  |
| C | 1 | 1 | 1 | 1 | no  |
| A | 0 | 0 | 1 | 0 | no  |
| C | 1 | 1 | 1 | 1 | no  |
| D | 1 | 0 | 1 | 1 | no  |
| B | 1 | 1 | 0 | 0 | yes |
| B | 0 | 0 | 0 | 1 | yes |
| D | 1 | 1 | 1 | 1 | no  |
| C | 1 | 1 | 1 | 1 | no  |
| A | 0 | 0 | 0 | 1 | no  |
| B | 1 | 1 | 0 | 1 | no  |
| B | 0 | 0 | 1 | 0 | no  |
| D | 1 | 1 | 0 | 0 | no  |
| C | 1 | 1 | 1 | 1 | no  |
| C | 1 | 0 | 0 | 1 | no  |
| D | 1 | 0 | 1 | 0 | yes |
| C | 1 | 0 | 1 | 0 | no  |
| C | 0 | 1 | 0 | 1 | no  |
| D | 1 | 1 | 1 | 1 | yes |
| D | 1 | 1 | 1 | 1 | yes |
| C | 0 | 0 | 1 | 0 | no  |
| C | 1 | 1 | 1 | 1 | no  |
| C | 1 | 1 | 1 | 1 | no  |
| B | 1 | 0 | 0 | 1 | no  |
| B | 0 | 0 | 0 | 1 | no  |
| B | 1 | 1 | 1 | 1 | yes |
| B | 1 | 1 | 1 | 1 | no  |
| B | 0 | 0 | 0 | 1 | no  |
| A | 1 | 1 | 1 | 1 | no  |
| C | 1 | 1 | 0 | 1 | no  |
| D | 0 | 0 | 1 | 0 | yes |
| C | 0 | 0 | 0 | 1 | yes |
| D | 1 | 1 | 1 | 1 | no  |

|   |   |   |   |   |     |
|---|---|---|---|---|-----|
| C | 0 | 1 | 0 | 1 | no  |
| B | 1 | 0 | 1 | 1 | no  |
| D | 0 | 0 | 0 | 1 | no  |
| C | 1 | 0 | 0 | 1 | no  |
| A | 1 | 1 | 1 | 1 | yes |
| D | 0 | 0 | 0 | 1 | no  |
| C | 0 | 1 | 0 | 1 | no  |
| C | 0 | 0 | 0 | 1 | yes |
| C | 1 | 1 | 0 | 1 | no  |
| B | 0 | 0 | 0 | 1 | yes |
| B | 1 | 0 | 0 | 1 | no  |
| D | 1 | 0 | 1 | 1 | yes |
| C | 0 | 0 | 0 | 1 | no  |
| D | 1 | 1 | 0 | 1 | no  |
| C | 0 | 0 | 0 | 1 | yes |
| D | 0 | 0 | 1 | 1 | yes |
| C | 1 | 1 | 0 | 1 | no  |
| B | 0 | 0 | 0 | 1 | no  |
| B | 1 | 0 | 1 | 1 | no  |
| B | 1 | 1 | 0 | 1 | no  |
| B | 1 | 1 | 0 | 1 | yes |
| C | 1 | 0 | 0 | 1 | no  |
| B | 0 | 0 | 1 | 1 | no  |
| C | 0 | 0 | 0 | 1 | no  |
| B | 1 | 1 | 1 | 1 | yes |
| C | 1 | 0 | 0 | 0 | no  |
| D | 1 | 0 | 0 | 0 | no  |
| C | 0 | 1 | 0 | 0 | yes |
| B | 0 | 1 | 0 | 0 | no  |
| C | 1 | 0 | 0 | 0 | no  |
| D | 0 | 1 | 0 | 0 | no  |
| C | 1 | 0 | 0 | 0 | no  |
| B | 0 | 1 | 0 | 0 | no  |
| D | 0 | 1 | 0 | 0 | no  |
| B | 1 | 0 | 0 | 0 | no  |
| C | 0 | 1 | 0 | 0 | yes |
| D | 0 | 1 | 0 | 0 | yes |
| C | 1 | 0 | 0 | 0 | no  |
| A | 0 | 1 | 0 | 0 | no  |
| C | 1 | 0 | 0 | 0 | no  |
| A | 1 | 0 | 0 | 0 | no  |
| C | 1 | 0 | 0 | 0 | no  |
| A | 0 | 1 | 1 | 0 | no  |
| B | 1 | 0 | 1 | 0 | no  |
| A | 1 | 0 | 0 | 0 | no  |
| A | 0 | 1 | 1 | 1 | no  |
| A | 1 | 1 | 1 | 1 | no  |

|   |   |   |   |   |     |
|---|---|---|---|---|-----|
| B | 1 | 1 | 1 | 0 | no  |
| A | 1 | 1 | 0 | 0 | no  |
| A | 0 | 1 | 1 | 1 | no  |
| A | 1 | 1 | 1 | 1 | yes |
| B | 1 | 0 | 0 | 0 | no  |
| A | 1 | 1 | 1 | 1 | no  |
| B | 1 | 1 | 1 | 1 | no  |
| B | 0 | 1 | 1 | 0 | no  |
| B | 0 | 0 | 0 | 1 | no  |
| D | 1 | 1 | 1 | 1 | yes |
| C | 1 | 1 | 1 | 1 | no  |
| C | 1 | 1 | 1 | 0 | no  |
| B | 1 | 0 | 0 | 0 | no  |
| B | 0 | 1 | 1 | 1 | no  |
| B | 0 | 1 | 1 | 0 | no  |
| B | 0 | 0 | 1 | 0 | no  |
| A | 1 | 0 | 0 | 1 | no  |
| A | 0 | 1 | 1 | 1 | no  |
| A | 1 | 1 | 1 | 1 | no  |
| C | 1 | 1 | 1 | 0 | yes |
| D | 1 | 1 | 0 | 0 | no  |
| C | 1 | 1 | 0 | 1 | no  |
| A | 1 | 1 | 1 | 1 | no  |
| A | 0 | 0 | 1 | 0 | no  |
| B | 1 | 1 | 1 | 1 | no  |
| D | 1 | 0 | 1 | 1 | yes |
| A | 1 | 1 | 0 | 0 | yes |
| B | 0 | 0 | 0 | 1 | no  |
| D | 1 | 1 | 1 | 1 | no  |
| B | 1 | 1 | 1 | 1 | no  |
| D | 0 | 0 | 0 | 1 | no  |
| C | 1 | 1 | 0 | 1 | no  |
| A | 0 | 0 | 1 | 0 | no  |
| B | 1 | 1 | 0 | 0 | no  |
| B | 1 | 1 | 1 | 1 | no  |
| C | 1 | 0 | 0 | 1 | yes |
| D | 1 | 0 | 1 | 0 | no  |
| D | 1 | 0 | 1 | 0 | no  |
| C | 0 | 1 | 0 | 1 | yes |
| C | 1 | 1 | 1 | 1 | yes |
| B | 1 | 1 | 1 | 1 | no  |
| B | 0 | 0 | 1 | 0 | no  |
| B | 1 | 1 | 1 | 1 | no  |
| B | 1 | 1 | 1 | 1 | no  |
| B | 1 | 0 | 0 | 1 | no  |
| B | 0 | 0 | 0 | 1 | yes |
| A | 1 | 1 | 1 | 1 | no  |

|   |   |   |   |   |     |
|---|---|---|---|---|-----|
| C | 1 | 1 | 1 | 1 | no  |
| C | 0 | 0 | 0 | 1 | no  |
| D | 1 | 1 | 1 | 1 | no  |
| B | 1 | 1 | 0 | 1 | yes |
| B | 0 | 0 | 1 | 0 | yes |
| B | 0 | 0 | 0 | 1 | no  |
| D | 1 | 1 | 1 | 1 | no  |
| C | 0 | 1 | 0 | 1 | no  |
| A | 1 | 0 | 1 | 1 | no  |
| C | 0 | 0 | 0 | 1 | no  |
| D | 1 | 0 | 0 | 1 | yes |
| B | 1 | 1 | 1 | 1 | no  |
| B | 0 | 0 | 0 | 1 | no  |
| D | 0 | 1 | 0 | 1 | yes |
| C | 0 | 0 | 0 | 1 | no  |
| A | 1 | 1 | 0 | 1 | yes |
| B | 0 | 0 | 0 | 1 | no  |
| B | 1 | 0 | 0 | 1 | yes |
| D | 1 | 0 | 1 | 1 | no  |
| C | 0 | 0 | 0 | 1 | no  |
| C | 1 | 1 | 0 | 1 | yes |
| D | 0 | 0 | 0 | 1 | yes |
| C | 0 | 0 | 1 | 1 | no  |
| C | 1 | 1 | 0 | 1 | no  |
| D | 0 | 0 | 0 | 1 | no  |
| D | 1 | 0 | 1 | 1 | no  |
| C | 1 | 1 | 0 | 1 | yes |
| C | 1 | 1 | 0 | 1 | no  |
| C | 1 | 0 | 0 | 1 | no  |
| B | 0 | 0 | 1 | 1 | no  |
| B | 0 | 0 | 0 | 1 | yes |
| B | 1 | 1 | 1 | 1 | no  |
| B | 1 | 0 | 0 | 0 | no  |
| B | 1 | 0 | 0 | 0 | yes |
| A | 0 | 1 | 0 | 0 | no  |
| C | 0 | 1 | 0 | 0 | no  |
| D | 1 | 0 | 0 | 0 | no  |
| C | 0 | 1 | 0 | 0 | no  |
| D | 1 | 0 | 0 | 0 | no  |
| C | 0 | 1 | 0 | 0 | no  |
| B | 0 | 1 | 0 | 0 | no  |
| D | 1 | 0 | 0 | 0 | yes |
| C | 0 | 1 | 0 | 0 | yes |
| A | 0 | 1 | 0 | 0 | no  |
| D | 1 | 0 | 0 | 0 | no  |
| C | 0 | 1 | 0 | 0 | no  |
| C | 1 | 0 | 0 | 0 | no  |



|   |   |   |   |   |     |
|---|---|---|---|---|-----|
| C | 1 | 0 | 0 | 0 | no  |
| B | 1 | 0 | 0 | 0 | no  |
| B | 0 | 1 | 1 | 0 | no  |
| D | 1 | 0 | 1 | 0 | no  |
| C | 1 | 0 | 0 | 0 | no  |
| D | 0 | 1 | 1 | 1 | no  |
| C | 1 | 1 | 1 | 1 | no  |
| D | 1 | 1 | 1 | 0 | no  |
| C | 1 | 1 | 0 | 0 | no  |
| B | 0 | 1 | 1 | 1 | yes |
| B | 1 | 1 | 1 | 1 | no  |
| B | 1 | 0 | 0 | 0 | no  |
| B | 1 | 1 | 1 | 1 | no  |
| C | 1 | 1 | 1 | 1 | no  |
| B | 0 | 1 | 1 | 0 | no  |
| C | 0 | 0 | 0 | 1 | yes |
| B | 1 | 1 | 1 | 1 | no  |
| C | 1 | 1 | 1 | 1 | no  |
| D | 1 | 1 | 1 | 0 | no  |
| C | 1 | 0 | 0 | 0 | no  |
| B | 0 | 1 | 1 | 1 | no  |
| C | 0 | 1 | 1 | 0 | no  |
| D | 0 | 0 | 1 | 0 | no  |
| C | 1 | 0 | 0 | 1 | no  |
| B | 0 | 1 | 1 | 1 | no  |
| D | 1 | 1 | 1 | 1 | yes |
| B | 1 | 1 | 1 | 0 | no  |
| C | 1 | 1 | 0 | 0 | no  |
| D | 1 | 1 | 0 | 1 | no  |
| C | 1 | 1 | 1 | 1 | no  |
| A | 0 | 0 | 1 | 0 | no  |
| C | 1 | 1 | 1 | 1 | yes |
| A | 1 | 0 | 1 | 1 | yes |
| C | 1 | 1 | 0 | 0 | no  |
| A | 0 | 0 | 0 | 1 | no  |
| B | 1 | 1 | 1 | 1 | no  |
| A | 1 | 1 | 1 | 1 | no  |
| A | 0 | 0 | 0 | 1 | no  |
| A | 1 | 1 | 0 | 1 | no  |
| B | 0 | 0 | 1 | 0 | no  |
| A | 1 | 1 | 0 | 0 | no  |
| A | 1 | 1 | 1 | 1 | yes |
| A | 1 | 0 | 0 | 1 | no  |
| B | 1 | 0 | 1 | 0 | no  |
| A | 1 | 0 | 1 | 0 | yes |
| B | 0 | 1 | 0 | 1 | yes |
| B | 1 | 1 | 1 | 1 | no  |

|   |   |   |   |   |     |
|---|---|---|---|---|-----|
| B | 1 | 1 | 1 | 1 | no  |
| D | 0 | 0 | 1 | 0 | no  |
| C | 1 | 1 | 1 | 1 | no  |
| C | 1 | 1 | 1 | 1 | no  |
| B | 1 | 0 | 0 | 1 | yes |
| B | 0 | 0 | 0 | 1 | no  |
| B | 1 | 1 | 1 | 1 | no  |
| B | 1 | 1 | 1 | 1 | no  |
| A | 0 | 0 | 0 | 1 | no  |
| A | 1 | 1 | 1 | 1 | yes |
| A | 1 | 1 | 0 | 1 | yes |
| C | 0 | 0 | 1 | 0 | no  |
| D | 0 | 0 | 0 | 1 | no  |
| C | 1 | 1 | 1 | 1 | no  |
| A | 0 | 1 | 0 | 1 | no  |
| A | 1 | 0 | 1 | 1 | no  |
| B | 0 | 0 | 0 | 1 | yes |
| D | 1 | 0 | 0 | 1 | no  |
| A | 1 | 1 | 1 | 1 | no  |
| B | 0 | 0 | 0 | 1 | yes |
| D | 0 | 1 | 0 | 1 | no  |
| B | 0 | 0 | 0 | 1 | yes |
| D | 1 | 1 | 0 | 1 | no  |
| C | 0 | 0 | 0 | 1 | yes |
| A | 1 | 0 | 0 | 1 | no  |
| B | 1 | 0 | 1 | 1 | no  |
| B | 0 | 0 | 0 | 1 | yes |
| C | 1 | 1 | 0 | 1 | yes |
| D | 0 | 0 | 0 | 1 | no  |
| D | 0 | 0 | 1 | 1 | no  |
| C | 1 | 1 | 0 | 1 | no  |
| C | 0 | 0 | 0 | 1 | no  |
| B | 1 | 0 | 1 | 1 | yes |
| B | 1 | 1 | 0 | 1 | no  |
| B | 1 | 1 | 0 | 1 | no  |
| B | 1 | 0 | 0 | 1 | no  |
| B | 0 | 0 | 1 | 1 | yes |
| B | 0 | 0 | 0 | 1 | no  |
| A | 1 | 1 | 1 | 1 | no  |
| C | 1 | 0 | 0 | 0 | yes |
| C | 1 | 0 | 0 | 0 | no  |
| D | 0 | 1 | 0 | 0 | no  |
| B | 0 | 1 | 0 | 0 | no  |
| B | 1 | 0 | 0 | 0 | no  |
| B | 0 | 1 | 0 | 0 | no  |
| D | 1 | 0 | 0 | 0 | no  |
| C | 0 | 1 | 0 | 0 | no  |

|   |   |   |   |   |     |
|---|---|---|---|---|-----|
| A | 0 | 1 | 0 | 0 | yes |
| C | 1 | 0 | 0 | 0 | yes |
| D | 0 | 1 | 0 | 0 | no  |
| B | 0 | 1 | 0 | 0 | no  |
| B | 1 | 0 | 0 | 0 | no  |
| D | 0 | 1 | 0 | 0 | no  |
| C | 1 | 0 | 0 | 0 | no  |
| A | 1 | 0 | 0 | 0 | no  |
| B | 1 | 0 | 0 | 0 | no  |
| B | 0 | 1 | 1 | 0 | no  |
| D | 1 | 0 | 1 | 0 | no  |
| C | 1 | 0 | 0 | 0 | no  |
| C | 0 | 1 | 1 | 1 | no  |
| D | 1 | 1 | 1 | 1 | no  |
| C | 1 | 1 | 1 | 0 | no  |
| C | 1 | 1 | 0 | 0 | yes |
| D | 0 | 1 | 1 | 1 | no  |
| D | 1 | 1 | 1 | 1 | no  |
| C | 1 | 0 | 0 | 0 | no  |
| C | 1 | 1 | 1 | 1 | no  |
| C | 1 | 1 | 1 | 1 | no  |
| B | 0 | 1 | 1 | 0 | yes |
| B | 0 | 0 | 0 | 1 | no  |
| B | 1 | 1 | 1 | 1 | no  |
| B | 1 | 1 | 1 | 1 | no  |
| B | 1 | 1 | 1 | 0 | no  |
| A | 1 | 0 | 0 | 0 | no  |
| C | 0 | 1 | 1 | 1 | no  |
| D | 0 | 1 | 1 | 0 | no  |
| C | 0 | 0 | 1 | 0 | no  |
| D | 1 | 0 | 0 | 1 | no  |
| C | 0 | 1 | 1 | 1 | yes |
| B | 1 | 1 | 1 | 1 | no  |
| D | 1 | 1 | 1 | 0 | no  |
| C | 1 | 1 | 0 | 0 | no  |
| A | 1 | 1 | 0 | 1 | no  |
| D | 1 | 1 | 1 | 1 | no  |
| C | 0 | 0 | 1 | 0 | yes |
| C | 1 | 1 | 1 | 1 | yes |
| C | 1 | 0 | 1 | 1 | no  |
| B | 1 | 1 | 0 | 0 | no  |
| B | 0 | 0 | 0 | 1 | no  |
| D | 1 | 1 | 1 | 1 | no  |
| C | 1 | 1 | 1 | 1 | no  |
| D | 0 | 0 | 0 | 1 | no  |
| C | 1 | 1 | 0 | 1 | no  |
| D | 0 | 0 | 1 | 0 | no  |

|   |   |   |   |   |     |
|---|---|---|---|---|-----|
| C | 1 | 1 | 0 | 0 | yes |
| B | 1 | 1 | 1 | 1 | no  |
| B | 1 | 0 | 0 | 1 | no  |
| B | 1 | 0 | 1 | 0 | yes |
| B | 1 | 0 | 1 | 0 | yes |
| C | 0 | 1 | 0 | 1 | no  |
| B | 1 | 1 | 1 | 1 | no  |
| C | 1 | 1 | 1 | 1 | no  |
| B | 0 | 0 | 1 | 0 | no  |
| C | 1 | 1 | 1 | 1 | no  |
| D | 1 | 1 | 1 | 1 | yes |
| C | 1 | 0 | 0 | 1 | no  |
| B | 0 | 0 | 0 | 1 | no  |
| C | 1 | 1 | 1 | 1 | no  |
| D | 1 | 1 | 1 | 1 | no  |
| C | 0 | 0 | 0 | 1 | yes |
| B | 1 | 1 | 1 | 1 | yes |
| D | 1 | 1 | 0 | 1 | no  |
| B | 0 | 0 | 1 | 0 | no  |
| C | 0 | 0 | 0 | 1 | no  |
| D | 1 | 1 | 1 | 1 | no  |
| C | 0 | 1 | 0 | 1 | no  |
| A | 1 | 0 | 1 | 1 | yes |
| C | 0 | 0 | 0 | 1 | no  |
| A | 1 | 0 | 0 | 1 | no  |
| C | 1 | 1 | 1 | 1 | yes |
| A | 0 | 0 | 0 | 1 | no  |
| B | 0 | 1 | 0 | 1 | yes |
| A | 0 | 0 | 0 | 1 | no  |
| A | 1 | 1 | 0 | 1 | yes |
| A | 0 | 0 | 0 | 1 | no  |
| B | 1 | 0 | 0 | 1 | no  |
| A | 1 | 0 | 1 | 1 | yes |
| A | 0 | 0 | 0 | 1 | yes |
| A | 1 | 1 | 0 | 1 | no  |
| B | 0 | 0 | 0 | 1 | no  |
| A | 0 | 0 | 1 | 1 | no  |
| B | 1 | 1 | 0 | 1 | no  |
| B | 0 | 0 | 0 | 1 | yes |
| B | 1 | 0 | 1 | 1 | no  |
| D | 1 | 1 | 0 | 1 | no  |
| C | 1 | 1 | 0 | 1 | no  |
| C | 1 | 0 | 0 | 1 | yes |
| B | 0 | 0 | 1 | 1 | no  |
| B | 0 | 0 | 0 | 1 | no  |
| B | 1 | 1 | 1 | 1 | yes |
| B | 1 | 0 | 0 | 0 | no  |

|   |   |   |   |   |     |
|---|---|---|---|---|-----|
| A | 1 | 0 | 0 | 0 | no  |
| A | 0 | 1 | 0 | 0 | no  |
| A | 0 | 1 | 0 | 0 | no  |
| C | 1 | 0 | 0 | 0 | no  |
| D | 0 | 1 | 0 | 0 | no  |
| C | 1 | 0 | 0 | 0 | no  |
| A | 0 | 1 | 0 | 0 | yes |
| A | 0 | 1 | 0 | 0 | yes |
| B | 1 | 0 | 0 | 0 | no  |
| D | 0 | 1 | 0 | 0 | no  |
| A | 0 | 1 | 0 | 0 | no  |
| B | 1 | 0 | 0 | 0 | no  |
| D | 0 | 1 | 0 | 0 | no  |
| B | 1 | 0 | 0 | 0 | no  |
| D | 1 | 0 | 0 | 0 | no  |
| C | 1 | 0 | 0 | 0 | no  |
| A | 0 | 1 | 1 | 0 | no  |
| B | 1 | 0 | 1 | 0 | no  |
| B | 1 | 0 | 0 | 0 | no  |
| C | 0 | 1 | 1 | 1 | no  |
| D | 1 | 1 | 1 | 1 | no  |
| D | 1 | 1 | 1 | 0 | yes |
| C | 1 | 1 | 0 | 0 | no  |
| C | 0 | 1 | 1 | 1 | no  |
| B | 1 | 1 | 1 | 1 | no  |
| B | 1 | 0 | 0 | 0 | no  |
| B | 1 | 1 | 1 | 1 | no  |
| B | 1 | 1 | 1 | 1 | yes |
| B | 0 | 1 | 1 | 0 | no  |
| B | 0 | 0 | 0 | 1 | no  |
| A | 1 | 1 | 1 | 1 | no  |
| C | 1 | 1 | 1 | 1 | no  |
| C | 1 | 1 | 1 | 0 | no  |
| D | 1 | 0 | 0 | 0 | no  |
| B | 0 | 1 | 1 | 1 | no  |
| B | 0 | 1 | 1 | 0 | no  |
| B | 0 | 0 | 1 | 0 | no  |
| D | 1 | 0 | 0 | 1 | yes |
| C | 0 | 1 | 1 | 1 | no  |
| A | 1 | 1 | 1 | 1 | no  |
| C | 1 | 1 | 1 | 0 | no  |
| D | 1 | 1 | 0 | 0 | no  |
| B | 1 | 1 | 0 | 1 | no  |
| B | 1 | 1 | 1 | 1 | yes |
| D | 0 | 0 | 1 | 0 | yes |
| C | 1 | 1 | 1 | 1 | no  |
| A | 1 | 0 | 1 | 1 | no  |

|   |   |   |   |   |     |
|---|---|---|---|---|-----|
| B | 1 | 1 | 0 | 0 | no  |
| B | 0 | 0 | 0 | 1 | no  |
| D | 1 | 1 | 1 | 1 | no  |
| C | 1 | 1 | 1 | 1 | no  |
| C | 0 | 0 | 0 | 1 | no  |
| D | 1 | 1 | 0 | 1 | no  |
| C | 0 | 0 | 1 | 0 | yes |
| C | 1 | 1 | 0 | 0 | no  |
| D | 1 | 1 | 1 | 1 | no  |
| D | 1 | 0 | 0 | 1 | yes |
| C | 1 | 0 | 1 | 0 | yes |
| C | 1 | 0 | 1 | 0 | no  |
| C | 0 | 1 | 0 | 1 | no  |
| B | 1 | 1 | 1 | 1 | no  |
| B | 1 | 1 | 1 | 1 | no  |
| B | 0 | 0 | 1 | 0 | no  |
| B | 1 | 1 | 1 | 1 | yes |
| B | 1 | 1 | 1 | 1 | no  |
| A | 1 | 0 | 0 | 1 | no  |
| C | 0 | 0 | 0 | 1 | no  |
| D | 1 | 1 | 1 | 1 | no  |
| C | 1 | 1 | 1 | 1 | yes |
| D | 0 | 0 | 0 | 1 | yes |
| C | 1 | 1 | 1 | 1 | no  |
| B | 1 | 1 | 0 | 1 | no  |
| D | 0 | 0 | 1 | 0 | no  |
| C | 0 | 0 | 0 | 1 | no  |
| A | 1 | 1 | 1 | 1 | no  |
| D | 0 | 1 | 0 | 1 | yes |
| C | 1 | 0 | 1 | 1 | no  |
| C | 0 | 0 | 0 | 1 | no  |
| C | 1 | 0 | 0 | 1 | yes |
| B | 1 | 1 | 1 | 1 | no  |
| B | 0 | 0 | 0 | 1 | yes |
| D | 0 | 1 | 0 | 1 | no  |
| C | 0 | 0 | 0 | 1 | yes |
| D | 1 | 1 | 0 | 1 | no  |
| C | 0 | 0 | 0 | 1 | no  |
| D | 1 | 0 | 0 | 1 | yes |
| C | 1 | 0 | 1 | 1 | yes |
| B | 0 | 0 | 0 | 1 | no  |
| B | 1 | 1 | 0 | 1 | no  |
| B | 0 | 0 | 0 | 1 | no  |
| B | 0 | 0 | 1 | 1 | no  |
| C | 1 | 1 | 0 | 1 | yes |
| B | 0 | 0 | 0 | 1 | no  |
| C | 1 | 0 | 1 | 1 | no  |

|   |   |   |   |   |     |
|---|---|---|---|---|-----|
| B | 1 | 1 | 0 | 1 | no  |
| C | 1 | 1 | 0 | 1 | yes |
| D | 1 | 0 | 0 | 1 | no  |
| C | 0 | 0 | 1 | 1 | no  |
| B | 0 | 0 | 0 | 1 | yes |
| C | 1 | 1 | 1 | 1 | no  |
| D | 1 | 0 | 0 | 0 | no  |
| C | 1 | 0 | 0 | 0 | no  |
| B | 0 | 1 | 0 | 0 | no  |
| D | 0 | 1 | 0 | 0 | no  |
| B | 1 | 0 | 0 | 0 | no  |
| C | 0 | 1 | 0 | 0 | no  |
| D | 1 | 0 | 0 | 0 | yes |
| C | 0 | 1 | 0 | 0 | yes |
| A | 0 | 1 | 0 | 0 | no  |
| C | 1 | 0 | 0 | 0 | no  |
| A | 0 | 1 | 0 | 0 | no  |
| C | 0 | 1 | 0 | 0 | no  |
| A | 1 | 0 | 0 | 0 | no  |
| B | 0 | 1 | 0 | 0 | no  |
| A | 1 | 0 | 0 | 0 | no  |
| A | 1 | 0 | 0 | 0 | no  |
| A | 1 | 0 | 0 | 0 | no  |
| B | 0 | 1 | 1 | 0 | no  |
| A | 1 | 0 | 1 | 0 | no  |
| A | 1 | 0 | 0 | 0 | no  |
| A | 0 | 1 | 1 | 1 | no  |
| B | 1 | 1 | 1 | 1 | yes |
| A | 1 | 1 | 1 | 0 | no  |
| B | 1 | 1 | 0 | 0 | no  |
| B | 0 | 1 | 1 | 1 | no  |
| B | 1 | 1 | 1 | 1 | no  |
| D | 1 | 0 | 0 | 0 | no  |
| C | 1 | 1 | 1 | 1 | yes |
| C | 1 | 1 | 1 | 1 | no  |
| B | 0 | 1 | 1 | 0 | no  |
| B | 0 | 0 | 0 | 1 | no  |
| B | 1 | 1 | 1 | 1 | no  |
| B | 1 | 1 | 1 | 1 | no  |
| A | 1 | 1 | 1 | 0 | no  |
| A | 1 | 0 | 0 | 0 | no  |
| A | 0 | 1 | 1 | 1 | no  |
| C | 0 | 1 | 1 | 0 | no  |
| D | 0 | 0 | 1 | 0 | yes |
| C | 1 | 0 | 0 | 1 | no  |
| A | 0 | 1 | 1 | 1 | no  |
| A | 1 | 1 | 1 | 1 | no  |

|   |   |   |   |   |     |
|---|---|---|---|---|-----|
| B | 1 | 1 | 1 | 0 | no  |
| D | 1 | 1 | 0 | 0 | no  |
| A | 1 | 1 | 0 | 1 | yes |
| B | 1 | 1 | 1 | 1 | yes |
| D | 0 | 0 | 1 | 0 | no  |
| B | 1 | 1 | 1 | 1 | no  |
| D | 1 | 0 | 1 | 1 | no  |
| C | 1 | 1 | 0 | 0 | no  |
| A | 0 | 0 | 0 | 1 | no  |
| B | 1 | 1 | 1 | 1 | no  |
| B | 1 | 1 | 1 | 1 | no  |
| C | 0 | 0 | 0 | 1 | no  |
| D | 1 | 1 | 0 | 1 | yes |
| D | 0 | 0 | 1 | 0 | no  |
| C | 1 | 1 | 0 | 0 | no  |
| C | 1 | 1 | 1 | 1 | yes |
| B | 1 | 0 | 0 | 1 | yes |
| B | 1 | 0 | 1 | 0 | no  |
